# Supplementary material
Source: publisher figshare collection journal article supplement (https://acs.figshare.com/ndownloader/files/5138752)
Supplement: Supplementary file 1 [file 5138752]

data_Forest_Michael's_second_fm

_audit_creation_date                  'Tue Jun  8 16:28:15 2004'
_audit_creation_method                'by teXsan'
_audit_update_record                   ?

#------------------------------------------------------------------------------

# PROCESSING SUMMARY (IUCr Office Use Only) 
_journal_date_recd_electronic          ?
_journal_date_from_coeditor            ?
_journal_date_accepted                 ?
_journal_coeditor_code                 ?

#------------------------------------------------------------------------------

# SUBMISSION DETAILS 
_publ_contact_author_name             ' ENTER NAME'
_publ_contact_author_address
;
    ENTER ADDRESS
;
_publ_contact_author_email            ' ENTER EMAIL ADDRESS '
_publ_contact_author_fax              ' ENTER FAX NUMBER '
_publ_contact_author_phone            ' ENTER PHONE NUMBER '
_publ_contact_letter
;
    ENTER TEXT OF LETTER
;
_publ_requested_journal               ' ENTER JOURNAL NAME HERE'
_publ_requested_category              ' CHOOSE FI FM FO CI CM CO or AD'

_publ_requested_coeditor_name          ?

#------------------------------------------------------------------------------

# TITLE AND AUTHOR LIST 

_publ_section_title
;
    ENTER SECTION TITLE
;

_publ_section_title_footnote
;
    ENTER FOOTNOTE TO TITLE OF PAPER
;
loop_
_publ_author_name
_publ_author_address
' FIRST AUTHORS NAME '
;
  FIRST AUTHORS ADDRESS
;

#------------------------------------------------------------------------------

# TEXT 

_publ_section_abstract
;
    ENTER ABSTRACT
;

_publ_section_comment
;
    ENTER TEXT
;

_publ_section_acknowledgements
;
    ENTER ACKNOWLEDGEMENTS
;

_publ_section_references
;
    ENTER OTHER REFERENCES
Molecular Structure Corporation, Rigaku Corporation. (1998). teXsan. 
Single Crystal Structure Analysis Software. Version 1.10.
MSC, 3200 Research Forest Drive, The Woodlands, TX 77381, USA.
Rigaku, 3-9-12 Akishima, Tokyo, Japan.
Blessing, R. H., (1995), Acta Crystallogr, A51, 33-38.
;

_publ_section_figure_captions
;
    ENTER FIGURE CAPTIONS
;

_publ_section_exptl_prep
;
    ENTER COMPOUND PREPARATION DETAILS
;

_publ_section_exptl_refinement
;
    ENTER SPECIAL DETAILS OF THE REFINEMENT
;

#------------------------------------------------------------------------------

# CHEMICAL DATA 
_chemical_formula_sum                  'C27 H33 N Zr '
_chemical_formula_moiety               'C27 H33 N Zr '
_chemical_formula_weight               462.78
_chemical_melting_point                ?

#------------------------------------------------------------------------------

# CRYSTAL DATA 
_symmetry_cell_setting                 monoclinic
_symmetry_space_group_name_H-M        'P 21/c     '
_symmetry_Int_Tables_number            14
_symmetry_space_group_name_Hall        ?

#------------------------------------------------------------------------------

loop_
_symmetry_equiv_pos_as_xyz
x,y,z
-x,1/2+y,1/2-z
-x,-y,-z
x,1/2-y,1/2+z
_cell_length_a                         16.713(10)
_cell_length_b                         7.980(5)
_cell_length_c                         16.138(9)
_cell_angle_alpha                      89
_cell_angle_beta                       92.41(1)
_cell_angle_gamma                      89
_cell_volume                           2150(2)
_cell_formula_units_Z                  4
_cell_measurement_reflns_used          1640
_cell_measurement_theta_min            2.4
_cell_measurement_theta_max            21.8
_cell_measurement_temperature          143.2

#------------------------------------------------------------------------------

_exptl_crystal_description            'tablet'
_exptl_crystal_colour                 'orange'
_exptl_crystal_size_max                0.150
_exptl_crystal_size_mid                0.120
_exptl_crystal_size_min                0.020
_exptl_crystal_size_rad                ?
_exptl_crystal_density_diffrn          1.429
_exptl_crystal_density_meas            ?
_exptl_crystal_density_method         'not measured'
_exptl_crystal_F_000                   968.00
_exptl_absorpt_coefficient_mu          0.524
_exptl_absorpt_correction_type         empirical
_exptl_absorpt_process_details         'Blessing, 1995'
_exptl_absorpt_correction_T_min        0.544
_exptl_absorpt_correction_T_max        0.990

#------------------------------------------------------------------------------

# EXPERIMENTAL DATA 
_diffrn_radiation_type                'Mo K\a'
_diffrn_radiation_wavelength           0.7107
_diffrn_measurement_device_type        'Bruker SMART 1000'
_diffrn_measurement_method             \w-scans
_diffrn_standards_number               0
_diffrn_standards_interval_count       0
_diffrn_standards_interval_time        0
_diffrn_standards_decay_%              0
_diffrn_reflns_number                  9717
_diffrn_reflns_av_R_equivalents        0.050
_diffrn_reflns_theta_max               24.75
_diffrn_measured_fraction_theta_max    0.9643
_diffrn_reflns_theta_full              24.75
_diffrn_measured_fraction_theta_full   0.9643
_diffrn_reflns_limit_h_min             0
_diffrn_reflns_limit_h_max             19
_diffrn_reflns_limit_k_min             0
_diffrn_reflns_limit_k_max             9
_diffrn_reflns_limit_l_min             -18
_diffrn_reflns_limit_l_max             18

#------------------------------------------------------------------------------

# REFINEMENT DATA 
_refine_special_details
;
Refinement using reflections with F^2^ > 3.0 sigma(F^2^). The weighted R-factor
(wR), goodness of fit (S) and R-factor (gt) are based on F, with F set to zero 
for negative F. The threshold expression of F^2^ > 3.0 sigma(F^2^) is used only 
for calculating R-factor (gt).
;
_reflns_number_total                   3563
_reflns_number_gt                      1788
_reflns_threshold_expression           F^2^>3.0\s(F^2^)
_refine_ls_structure_factor_coef       F
_refine_ls_R_factor_gt                 0.0470
_refine_ls_wR_factor_ref               0.0479
_refine_ls_hydrogen_treatment          constr
_refine_ls_number_reflns               1788
_refine_ls_number_parameters           265
_refine_ls_goodness_of_fit_ref         1.390
_refine_ls_weighting_scheme            calc
_refine_ls_weighting_details
   'w = 1/[\s^2^(Fo) + 0.00022|Fo|^2^]'
_refine_ls_shift/su_max                0.0003
_refine_diff_density_max               0.58
_refine_diff_density_min               -0.91
_refine_ls_extinction_method           none
_refine_ls_extinction_coef             ?
_refine_ls_abs_structure_details       ?
_refine_ls_abs_structure_Flack         ?
loop_
_atom_type_symbol
_atom_type_description
_atom_type_scat_dispersion_real
_atom_type_scat_dispersion_imag
_atom_type_scat_source
  'Zr' 'Zr'  -2.967 0.560 
;International Tables for Crystallography
(1992, Vol. C, Tables 4.2.6.8 and 6.1.1.1)
;
  'N' 'N'  0.006 0.003 
;International Tables for Crystallography
(1992, Vol. C, Tables 4.2.6.8 and 6.1.1.1)
;
  'C' 'C'  0.003 0.002 
;International Tables for Crystallography
(1992, Vol. C, Tables 4.2.6.8 and 6.1.1.1)
;
  'H' 'H'  0.000 0.000 
;International Tables for Crystallography
(1992, Vol. C, Table 6.1.1.2)
;

#------------------------------------------------------------------------------

_computing_data_collection            'Bruker-AXS SMART v5.054'
_computing_cell_refinement            'Bruker-AXS SAINT v6.40'
_computing_data_reduction             'Bruker-AXS SAINT v6.40'
_computing_structure_solution          SIR97
_computing_structure_refinement       'teXsan'
_computing_publication_material       'teXsan'
_computing_molecular_graphics          ?

#------------------------------------------------------------------------------

# ATOMIC COORDINATES AND DISPLACEMENT PARAMETERS 
loop_
_atom_site_label
_atom_site_type_symbol
_atom_site_fract_x
_atom_site_fract_y
_atom_site_fract_z
_atom_site_U_iso_or_equiv
_atom_site_adp_type
_atom_site_occupancy
_atom_site_calc_flag
_atom_site_refinement_flags
_atom_site_disorder_assembly
_atom_site_disorder_group
 Zr1    Zr 0.64682(4)  0.09907(10) 0.11270(5)  0.0180(2)   Uani 1.00 d . . .
 N1     N  0.7751(3)   0.0786(8)   0.1320(3)   0.013(2)    Uani 1.00 d . . .
 C1     C  0.6967(5)   0.374(1)    0.0559(5)   0.024(3)    Uani 1.00 d . . .
 C2     C  0.6819(4)   0.404(1)    0.1394(5)   0.029(2)    Uani 1.00 d . . .
 C3     C  0.5984(5)   0.390(1)    0.1470(5)   0.032(3)    Uani 1.00 d . . .
 C4     C  0.5640(4)   0.3496(9)   0.0702(6)   0.028(3)    Uani 1.00 d . . .
 C5     C  0.6243(5)   0.3410(9)   0.0116(5)   0.028(3)    Uani 1.00 d . . .
 C6     C  0.5758(5)   0.025(1)    0.2424(6)   0.041(3)    Uani 1.00 d . . .
 C7     C  0.5143(5)   0.0616(10)  0.1845(6)   0.031(3)    Uani 1.00 d . . .
 C8     C  0.5129(4)   -0.059(1)   0.1228(5)   0.022(3)    Uani 1.00 d . . .
 C9     C  0.5721(5)   -0.1789(10) 0.1453(6)   0.026(3)    Uani 1.00 d . . .
 C10    C  0.6115(4)   -0.125(1)   0.2164(6)   0.037(3)    Uani 1.00 d . . .
 C11    C  0.7776(4)   -0.088(1)   0.1089(4)   0.016(2)    Uani 1.00 d . . .
 C12    C  0.7177(4)   -0.1470(9)  0.0544(5)   0.017(3)    Uani 1.00 d . . .
 C13    C  0.6680(4)   -0.0503(9)  -0.0029(5)  0.019(3)    Uani 1.00 d . . .
 C14    C  0.7151(4)   0.0179(10)  -0.0759(5)  0.023(2)    Uani 1.00 d . . .
 C15    C  0.7669(4)   -0.112(1)   -0.1193(4)  0.026(2)    Uani 1.00 d . . .
 C16    C  0.8519(5)   -0.1460(10) -0.0817(5)  0.029(3)    Uani 1.00 d . . .
 C17    C  0.8680(4)   -0.2855(10) -0.0160(5)  0.025(3)    Uani 1.00 d . . .
 C18    C  0.9023(4)   -0.2318(9)  0.0698(5)   0.025(3)    Uani 1.00 d . . .
 C19    C  0.8421(4)   -0.2063(9)  0.1392(4)   0.016(2)    Uani 1.00 d . . .
 C20    C  0.8405(4)   0.1628(9)   0.1756(5)   0.017(2)    Uani 1.00 d . . .
 C21    C  0.8416(4)   0.1685(9)   0.2617(5)   0.019(2)    Uani 1.00 d . . .
 C22    C  0.8996(4)   0.265(1)    0.3044(5)   0.026(3)    Uani 1.00 d . . .
 C23    C  0.9534(4)   0.3581(9)   0.2606(5)   0.024(3)    Uani 1.00 d . . .
 C24    C  0.9530(4)   0.3505(9)   0.1774(5)   0.023(3)    Uani 1.00 d . . .
 C25    C  0.8972(4)   0.2522(10)  0.1317(5)   0.017(2)    Uani 1.00 d . . .
 C26    C  0.7843(4)   0.071(1)    0.3119(5)   0.031(3)    Uani 1.00 d . . .
 C27    C  0.9012(4)   0.2455(9)   0.0393(5)   0.022(3)    Uani 1.00 d . . .
 C100   C  0.6331      0.3718      0.0848      0.0025      Uiso 0.00 d P . .
 C101   C  0.5573      -0.0554     0.1823      0.0025      Uiso 0.00 d P . .
 H1     H  0.7481      0.3763      0.0328      0.0290      Uiso 1.00 calc . . .
 H2     H  0.7205      0.4292      0.1825      0.0345      Uiso 1.00 calc . . .
 H3     H  0.5706      0.4057      0.1965      0.0379      Uiso 1.00 calc . . .
 H4     H  0.5086      0.3306      0.0586      0.0333      Uiso 1.00 calc . . .
 H5     H  0.6174      0.3175      -0.0460     0.0335      Uiso 1.00 calc . . .
 H6     H  0.5908      0.0884      0.2903      0.0494      Uiso 1.00 calc . . .
 H7     H  0.4790      0.1546      0.1868      0.0378      Uiso 1.00 calc . . .
 H8     H  0.4785      -0.0612     0.0744      0.0263      Uiso 1.00 calc . . .
 H9     H  0.5828      -0.2794     0.1162      0.0310      Uiso 1.00 calc . . .
 H10    H  0.6557      -0.1800     0.2438      0.0443      Uiso 1.00 calc . . .
 H11    H  0.7083      -0.2644     0.0549      0.0209      Uiso 1.00 calc . . .
 H12    H  0.627(4)    -0.11(1)    -0.023(5)   0.0388      Uiso 1.00 calc . . .
 H13    H  0.6776      0.0626      -0.1160     0.0274      Uiso 1.00 calc . . .
 H14    H  0.7493      0.1049      -0.0554     0.0274      Uiso 1.00 calc . . .
 H15    H  0.7386      -0.2155     -0.1196     0.0309      Uiso 1.00 calc . . .
 H16    H  0.7725      -0.0752     -0.1747     0.0309      Uiso 1.00 calc . . .
 H17    H  0.8844      -0.1717     -0.1270     0.0348      Uiso 1.00 calc . . .
 H18    H  0.8696      -0.0441     -0.0567     0.0348      Uiso 1.00 calc . . .
 H19    H  0.8185      -0.3407     -0.0079     0.0300      Uiso 1.00 calc . . .
 H20    H  0.9047      -0.3624     -0.0384     0.0300      Uiso 1.00 calc . . .
 H21    H  0.9394      -0.3153     0.0883      0.0302      Uiso 1.00 calc . . .
 H22    H  0.9297      -0.1287     0.0630      0.0302      Uiso 1.00 calc . . .
 H23    H  0.8692      -0.1605     0.1869      0.0198      Uiso 1.00 calc . . .
 H24    H  0.8191      -0.3110     0.1529      0.0198      Uiso 1.00 calc . . .
 H25    H  0.9021      0.2675      0.3633      0.0311      Uiso 1.00 calc . . .
 H26    H  0.9910      0.4281      0.2895      0.0285      Uiso 1.00 calc . . .
 H27    H  0.9915      0.4132      0.1488      0.0278      Uiso 1.00 calc . . .
 H28    H  0.8013      0.0750      0.3687      0.0372      Uiso 1.00 calc . . .
 H29    H  0.7323      0.1187      0.3051      0.0372      Uiso 1.00 calc . . .
 H30    H  0.7829      -0.0420     0.2936      0.0372      Uiso 1.00 calc . . .
 H31    H  0.9070      0.3558      0.0182      0.0265      Uiso 1.00 calc . . .
 H32    H  0.8534      0.1970      0.0162      0.0265      Uiso 1.00 calc . . .
 H33    H  0.9458      0.1794      0.0249      0.0265      Uiso 1.00 calc . . .

loop_
_atom_site_aniso_label
_atom_site_aniso_U_11
_atom_site_aniso_U_22
_atom_site_aniso_U_33
_atom_site_aniso_U_12
_atom_site_aniso_U_13
_atom_site_aniso_U_23
 Zr1    0.0134(4)   0.0137(4)   0.0271(5)   -0.0002(5)  0.0046(3)   0.0015(5)  
 N1     0.013(3)    0.017(4)    0.009(4)    0.002(3)    -0.002(3)   -0.003(3)  
 C1     0.027(5)    0.016(5)    0.030(6)    0.005(4)    0.005(4)    0.006(4)   
 C2     0.032(5)    0.008(4)    0.045(6)    -0.004(4)   -0.003(4)   0.001(5)   
 C3     0.033(5)    0.014(5)    0.048(6)    0.009(5)    0.017(5)    -0.004(6)  
 C4     0.016(4)    0.022(6)    0.045(6)    0.009(3)    0.000(5)    -0.002(4)  
 C5     0.043(6)    0.017(5)    0.024(6)    0.005(4)    -0.008(5)   0.002(4)   
 C6     0.030(5)    0.058(7)    0.036(7)    -0.029(5)   0.010(5)    -0.005(5)  
 C7     0.026(5)    0.024(6)    0.046(7)    -0.006(4)   0.029(5)    0.000(5)   
 C8     0.012(4)    0.023(6)    0.031(6)    -0.007(4)   0.002(4)    0.012(4)   
 C9     0.021(5)    0.010(5)    0.048(7)    -0.004(4)   0.015(5)    0.005(5)   
 C10    0.012(4)    0.037(7)    0.062(7)    -0.008(4)   -0.003(5)   0.029(6)   
 C11    0.013(4)    0.008(4)    0.028(5)    -0.001(4)   0.004(4)    0.008(4)   
 C12    0.013(4)    0.015(6)    0.025(5)    -0.001(3)   0.005(4)    -0.006(4)  
 C13    0.010(4)    0.014(5)    0.032(6)    -0.002(3)   0.002(4)    0.005(4)   
 C14    0.022(4)    0.019(5)    0.026(6)    0.004(4)    -0.005(4)   -0.002(4)  
 C15    0.029(4)    0.029(5)    0.019(5)    0.004(5)    0.002(4)    0.003(5)   
 C16    0.031(5)    0.033(6)    0.024(5)    0.003(4)    0.003(5)    -0.006(4)  
 C17    0.024(5)    0.024(5)    0.027(6)    0.006(4)    0.008(4)    -0.007(4)  
 C18    0.020(5)    0.021(5)    0.035(6)    0.009(4)    0.006(4)    0.002(4)   
 C19    0.021(4)    0.024(5)    0.004(5)    -0.004(4)   -0.002(4)   0.000(4)   
 C20    0.016(4)    0.013(4)    0.022(6)    0.009(3)    -0.003(4)   -0.000(4)  
 C21    0.016(4)    0.025(5)    0.017(5)    0.006(3)    -0.006(4)   -0.004(4)  
 C22    0.020(5)    0.028(5)    0.029(6)    0.006(4)    -0.007(4)   0.003(4)   
 C23    0.020(4)    0.026(6)    0.024(6)    -0.003(4)   -0.006(4)   -0.005(4)  
 C24    0.016(4)    0.025(6)    0.029(6)    0.001(3)    0.002(4)    -0.003(4)  
 C25    0.014(4)    0.024(5)    0.013(5)    0.000(4)    0.003(4)    -0.002(4)  
 C26    0.029(5)    0.028(6)    0.036(6)    -0.009(4)   0.002(4)    0.007(4)   
 C27    0.018(5)    0.018(5)    0.030(6)    -0.003(4)   0.005(4)    0.003(4)   

#------------------------------------------------------------------------------

_geom_special_details
;
 ?
;
loop_
_geom_bond_atom_site_label_1
_geom_bond_atom_site_label_2
_geom_bond_distance
_geom_bond_site_symmetry_1
_geom_bond_site_symmetry_2
_geom_bond_publ_flag
 ZR1       N1        2.160(5)   . . yes
 ZR1       C1        2.535(8)   . . yes
 ZR1       C2        2.538(8)   . . yes
 ZR1       C3        2.528(9)   . . yes
 ZR1       C4        2.510(7)   . . yes
 ZR1       C5        2.546(8)   . . yes
 ZR1       C6        2.520(8)   . . yes
 ZR1       C7        2.560(7)   . . yes
 ZR1       C8        2.581(7)   . . yes
 ZR1       C9        2.610(8)   . . yes
 ZR1       C10       2.537(8)   . . yes
 ZR1       C11       2.652(7)   . . yes
 ZR1       C12       2.497(7)   . . yes
 ZR1       C13       2.254(8)   . . yes
 ZR1       C100      2.2327(8)  . . yes
 ZR1       C101      2.2713(9)  . . yes
 N1        C11       1.385(9)   . . yes
 N1        C20       1.441(9)   . . yes
 C1        C2        1.401(10)  . . yes
 C1        C5        1.41(1)    . . yes
 C2        C3        1.410(10)  . . yes
 C3        C4        1.38(1)    . . yes
 C4        C5        1.41(1)    . . yes
 C6        C7        1.39(1)    . . yes
 C6        C10       1.41(1)    . . yes
 C7        C8        1.39(1)    . . yes
 C8        C9        1.41(1)    . . yes
 C9        C10       1.37(1)    . . yes
 C11       C12       1.386(10)  . . yes
 C11       C19       1.497(10)  . . yes
 C12       C13       1.441(10)  . . yes
 C13       C14       1.544(10)  . . yes
 C14       C15       1.54(1)    . . yes
 C15       C16       1.545(10)  . . yes
 C16       C17       1.55(1)    . . yes
 C17       C18       1.54(1)    . . yes
 C18       C19       1.549(9)   . . yes
 C20       C21       1.389(10)  . . yes
 C20       C25       1.40(1)    . . yes
 C21       C22       1.40(1)    . . yes
 C21       C26       1.50(1)    . . yes
 C22       C23       1.38(1)    . . yes
 C23       C24       1.34(1)    . . yes
 C24       C25       1.405(10)  . . yes
 C25       C27       1.496(10)  . . yes
 C1        H1        0.950      . . no
 C2        H2        0.950      . . no
 C3        H3        0.950      . . no
 C4        H4        0.950      . . no
 C5        H5        0.950      . . no
 C6        H6        0.950      . . no
 C7        H7        0.950      . . no
 C8        H8        0.950      . . no
 C9        H9        0.950      . . no
 C10       H10       0.950      . . no
 C12       H11       0.950      . . no
 C13       H12       0.88(7)    . . no
 C14       H13       0.950      . . no
 C14       H14       0.950      . . no
 C15       H15       0.950      . . no
 C15       H16       0.950      . . no
 C16       H17       0.950      . . no
 C16       H18       0.950      . . no
 C17       H19       0.950      . . no
 C17       H20       0.950      . . no
 C18       H21       0.950      . . no
 C18       H22       0.950      . . no
 C19       H23       0.950      . . no
 C19       H24       0.950      . . no
 C22       H25       0.950      . . no
 C23       H26       0.950      . . no
 C24       H27       0.950      . . no
 C26       H28       0.950      . . no
 C26       H29       0.950      . . no
 C26       H30       0.950      . . no
 C27       H31       0.950      . . no
 C27       H32       0.950      . . no
 C27       H33       0.950      . . no

#------------------------------------------------------------------------------

loop_
_geom_angle_atom_site_label_1
_geom_angle_atom_site_label_2
_geom_angle_atom_site_label_3
_geom_angle
_geom_angle_site_symmetry_1
_geom_angle_site_symmetry_2
_geom_angle_site_symmetry_3
_geom_angle_publ_flag
 N1        ZR1       C1        77.2(2)     .  .  .  ?
 N1        ZR1       C2        80.1(2)     .  .  .  ?
 N1        ZR1       C3        111.3(3)    .  .  .  ?
 N1        ZR1       C4        129.2(2)    .  .  .  ?
 N1        ZR1       C5        105.6(2)    .  .  .  ?
 N1        ZR1       C6        111.2(3)    .  .  .  ?
 N1        ZR1       C7        143.0(3)    .  .  .  ?
 N1        ZR1       C8        144.3(2)    .  .  .  ?
 N1        ZR1       C9        112.8(2)    .  .  .  ?
 N1        ZR1       C10       96.2(2)     .  .  .  ?
 N1        ZR1       C11       31.4(2)     .  .  .  ?
 N1        ZR1       C12       60.7(2)     .  .  .  ?
 N1        ZR1       C13       83.7(2)     .  .  .  ?
 N1        ZR1       C100      101.3(2)    .  .  .  ?
 N1        ZR1       C101      123.9(2)    .  .  .  ?
 C11       ZR1       C12       31.0(2)     .  .  .  ?
 C11       ZR1       C13       61.6(2)     .  .  .  ?
 C11       ZR1       C100      128.5(2)    .  .  .  ?
 C11       ZR1       C101      105.4(2)    .  .  .  ?
 C12       ZR1       C13       34.8(2)     .  .  .  ?
 C12       ZR1       C100      137.5(2)    .  .  .  ?
 C12       ZR1       C101      95.3(2)     .  .  .  ?
 C13       ZR1       C100      111.5(2)    .  .  .  ?
 C13       ZR1       C101      104.6(2)    .  .  .  ?
 C100      ZR1       C101      124.37(4)   .  .  .  ?
 ZR1       N1        C11       94.3(4)     .  .  .  ?
 ZR1       N1        C20       139.7(5)    .  .  .  ?
 C11       N1        C20       123.3(6)    .  .  .  ?
 C2        C1        C5        109.8(7)    .  .  .  ?
 C1        C2        C3        106.6(7)    .  .  .  ?
 C2        C3        C4        108.5(7)    .  .  .  ?
 C3        C4        C5        109.3(7)    .  .  .  ?
 C1        C5        C4        105.8(7)    .  .  .  ?
 C7        C6        C10       106.9(8)    .  .  .  ?
 C6        C7        C8        109.0(8)    .  .  .  ?
 C7        C8        C9        107.2(7)    .  .  .  ?
 C8        C9        C10       108.2(8)    .  .  .  ?
 C6        C10       C9        108.7(7)    .  .  .  ?
 ZR1       C11       N1        54.3(3)     .  .  .  ?
 ZR1       C11       C12       68.3(4)     .  .  .  ?
 ZR1       C11       C19       158.4(5)    .  .  .  ?
 N1        C11       C12       117.8(6)    .  .  .  ?
 N1        C11       C19       123.1(6)    .  .  .  ?
 C12       C11       C19       119.1(7)    .  .  .  ?
 ZR1       C12       C11       80.7(4)     .  .  .  ?
 ZR1       C12       C13       63.3(4)     .  .  .  ?
 C11       C12       C13       127.5(7)    .  .  .  ?
 ZR1       C13       C12       81.8(5)     .  .  .  ?
 ZR1       C13       C14       123.2(5)    .  .  .  ?
 C12       C13       C14       112.3(6)    .  .  .  ?
 C13       C14       C15       115.1(6)    .  .  .  ?
 C14       C15       C16       117.7(6)    .  .  .  ?
 C15       C16       C17       121.6(7)    .  .  .  ?
 C16       C17       C18       117.5(7)    .  .  .  ?
 C17       C18       C19       117.3(6)    .  .  .  ?
 C11       C19       C18       109.1(6)    .  .  .  ?
 N1        C20       C21       118.8(7)    .  .  .  ?
 N1        C20       C25       120.3(7)    .  .  .  ?
 C21       C20       C25       120.6(7)    .  .  .  ?
 C20       C21       C22       119.4(7)    .  .  .  ?
 C20       C21       C26       122.8(7)    .  .  .  ?
 C22       C21       C26       117.8(7)    .  .  .  ?
 C21       C22       C23       119.7(7)    .  .  .  ?
 C22       C23       C24       120.8(7)    .  .  .  ?
 C23       C24       C25       121.7(7)    .  .  .  ?
 C20       C25       C24       117.8(7)    .  .  .  ?
 C20       C25       C27       123.1(7)    .  .  .  ?
 C24       C25       C27       119.1(7)    .  .  .  ?
 ZR1       C100      C1        90.5(4)     .  .  .  ?
 ZR1       C100      C2        90.1(4)     .  .  .  ?
 ZR1       C100      C3        89.9(4)     .  .  .  ?
 ZR1       C100      C4        89.1(4)     .  .  .  ?
 ZR1       C100      C5        90.3(3)     .  .  .  ?
 ZR1       C101      C6        87.6(4)     .  .  .  ?
 ZR1       C101      C7        90.0(3)     .  .  .  ?
 ZR1       C101      C8        90.9(3)     .  .  .  ?
 ZR1       C101      C9        92.7(4)     .  .  .  ?
 ZR1       C101      C10       88.8(4)     .  .  .  ?
 ZR1       C1        H1        118.216     .  .  .  no
 C2        C1        H1        125.093     .  .  .  no
 C5        C1        H1        125.091     .  .  .  no
 C100      C1        H1        179.890     .  .  .  no
 ZR1       C2        H2        118.074     .  .  .  no
 C1        C2        H2        126.714     .  .  .  no
 C3        C2        H2        126.713     .  .  .  no
 C100      C2        H2        179.682     .  .  .  no
 ZR1       C3        H3        118.528     .  .  .  no
 C2        C3        H3        125.764     .  .  .  no
 C4        C3        H3        125.764     .  .  .  no
 C100      C3        H3        179.427     .  .  .  no
 ZR1       C4        H4        116.635     .  .  .  no
 C3        C4        H4        125.358     .  .  .  no
 C5        C4        H4        125.356     .  .  .  no
 C100      C4        H4        179.407     .  .  .  no
 ZR1       C5        H5        119.069     .  .  .  no
 C1        C5        H5        127.082     .  .  .  no
 C4        C5        H5        127.082     .  .  .  no
 C100      C5        H5        179.636     .  .  .  no
 ZR1       C6        H6        115.584     .  .  .  no
 C7        C6        H6        126.553     .  .  .  no
 C10       C6        H6        126.556     .  .  .  no
 C101      C6        H6        179.688     .  .  .  no
 ZR1       C7        H7        118.553     .  .  .  no
 C6        C7        H7        125.516     .  .  .  no
 C8        C7        H7        125.516     .  .  .  no
 C101      C7        H7        178.912     .  .  .  no
 ZR1       C8        H8        116.874     .  .  .  no
 C7        C8        H8        126.420     .  .  .  no
 C9        C8        H8        126.423     .  .  .  no
 C101      C8        H8        178.456     .  .  .  no
 ZR1       C9        H9        121.067     .  .  .  no
 C8        C9        H9        125.908     .  .  .  no
 C10       C9        H9        125.909     .  .  .  no
 C101      C9        H9        178.511     .  .  .  no
 ZR1       C10       H10       115.689     .  .  .  no
 C6        C10       H10       125.662     .  .  .  no
 C9        C10       H10       125.664     .  .  .  no
 C101      C10       H10       179.098     .  .  .  no
 ZR1       C12       H11       133.697     .  .  .  no
 C11       C12       H11       116.249     .  .  .  no
 C13       C12       H11       116.253     .  .  .  no
 ZR1       C13       H12       116(4)      .  .  .  no
 C12       C13       H12       111(5)      .  .  .  no
 C14       C13       H12       108(5)      .  .  .  no
 C13       C14       H13       108.050     .  .  .  no
 C13       C14       H14       108.049     .  .  .  no
 C15       C14       H13       108.053     .  .  .  no
 C15       C14       H14       108.053     .  .  .  no
 H13       C14       H14       109.460     .  .  .  no
 C14       C15       H15       107.375     .  .  .  no
 C14       C15       H16       107.375     .  .  .  no
 C16       C15       H15       107.373     .  .  .  no
 C16       C15       H16       107.370     .  .  .  no
 H15       C15       H16       109.460     .  .  .  no
 C15       C16       H17       106.370     .  .  .  no
 C15       C16       H18       106.368     .  .  .  no
 C17       C16       H17       106.372     .  .  .  no
 C17       C16       H18       106.370     .  .  .  no
 H17       C16       H18       109.463     .  .  .  no
 C16       C17       H19       107.420     .  .  .  no
 C16       C17       H20       107.418     .  .  .  no
 C18       C17       H19       107.422     .  .  .  no
 C18       C17       H20       107.421     .  .  .  no
 H19       C17       H20       109.459     .  .  .  no
 C17       C18       H21       107.496     .  .  .  no
 C17       C18       H22       107.496     .  .  .  no
 C19       C18       H21       107.494     .  .  .  no
 C19       C18       H22       107.493     .  .  .  no
 H21       C18       H22       109.460     .  .  .  no
 C11       C19       H23       109.567     .  .  .  no
 C11       C19       H24       109.568     .  .  .  no
 C18       C19       H23       109.565     .  .  .  no
 C18       C19       H24       109.564     .  .  .  no
 H23       C19       H24       109.461     .  .  .  no
 C21       C22       H25       120.152     .  .  .  no
 C23       C22       H25       120.152     .  .  .  no
 C22       C23       H26       119.606     .  .  .  no
 C24       C23       H26       119.606     .  .  .  no
 C23       C24       H27       119.136     .  .  .  no
 C25       C24       H27       119.137     .  .  .  no
 C21       C26       H28       109.469     .  .  .  no
 C21       C26       H29       109.470     .  .  .  no
 C21       C26       H30       109.470     .  .  .  no
 H28       C26       H29       109.472     .  .  .  no
 H28       C26       H30       109.473     .  .  .  no
 H29       C26       H30       109.474     .  .  .  no
 C25       C27       H31       109.470     .  .  .  no
 C25       C27       H32       109.468     .  .  .  no
 C25       C27       H33       109.471     .  .  .  no
 H31       C27       H32       109.471     .  .  .  no
 H31       C27       H33       109.475     .  .  .  no
 H32       C27       H33       109.472     .  .  .  no

#------------------------------------------------------------------------------

loop_
_geom_torsion_atom_site_label_1
_geom_torsion_atom_site_label_2
_geom_torsion_atom_site_label_3
_geom_torsion_atom_site_label_4
_geom_torsion
_geom_torsion_site_symmetry_1
_geom_torsion_site_symmetry_2
_geom_torsion_site_symmetry_3
_geom_torsion_site_symmetry_4
_geom_torsion_publ_flag
   ZR1     N1      C11     C12     26.7(7)  1_555 1_555 1_555 1_555 yes
   ZR1     N1      C11     C19     -154.0(6) 1_555 1_555 1_555 1_555 yes
   ZR1     N1      C20     C21     63.3(10) 1_555 1_555 1_555 1_555 yes
   ZR1     N1      C20     C25     -110.0(8) 1_555 1_555 1_555 1_555 yes
   ZR1     C1      C2      C3      -66.7(6) 1_555 1_555 1_555 1_555 yes
   ZR1     C1      C2      C100    -66.3(3) 1_555 1_555 1_555 1_555 yes
   ZR1     C1      C5      C4      65.7(5)  1_555 1_555 1_555 1_555 yes
   ZR1     C1      C5      C100    66.2(3)  1_555 1_555 1_555 1_555 yes
   ZR1     C1      C100    C2      89.9(5)  1_555 1_555 1_555 1_555 yes
   ZR1     C1      C100    C3      90.6(9)  1_555 1_555 1_555 1_555 yes
   ZR1     C1      C100    C4      -89.3(8) 1_555 1_555 1_555 1_555 yes
   ZR1     C1      C100    C5      -90.2(4) 1_555 1_555 1_555 1_555 yes
   ZR1     C2      C1      C5      66.4(6)  1_555 1_555 1_555 1_555 yes
   ZR1     C2      C1      C100    66.3(3)  1_555 1_555 1_555 1_555 yes
   ZR1     C2      C3      C4      -65.9(6) 1_555 1_555 1_555 1_555 yes
   ZR1     C2      C3      C100    -66.6(3) 1_555 1_555 1_555 1_555 yes
   ZR1     C2      C100    C1      -90.5(4) 1_555 1_555 1_555 1_555 yes
   ZR1     C2      C100    C3      89.9(5)  1_555 1_555 1_555 1_555 yes
   ZR1     C2      C100    C4      88.6(8)  1_555 1_555 1_555 1_555 yes
   ZR1     C2      C100    C5      -90.6(8) 1_555 1_555 1_555 1_555 yes
   ZR1     C3      C2      C1      67.0(6)  1_555 1_555 1_555 1_555 yes
   ZR1     C3      C2      C100    66.6(3)  1_555 1_555 1_555 1_555 yes
   ZR1     C3      C4      C5      -67.9(5) 1_555 1_555 1_555 1_555 yes
   ZR1     C3      C4      C100    -67.2(3) 1_555 1_555 1_555 1_555 yes
   ZR1     C3      C100    C1      -90.8(8) 1_555 1_555 1_555 1_555 yes
   ZR1     C3      C100    C2      -90.1(5) 1_555 1_555 1_555 1_555 yes
   ZR1     C3      C100    C4      89.1(4)  1_555 1_555 1_555 1_555 yes
   ZR1     C3      C100    C5      90.5(8)  1_555 1_555 1_555 1_555 yes
   ZR1     C4      C3      C2      66.5(6)  1_555 1_555 1_555 1_555 yes
   ZR1     C4      C3      C100    67.2(3)  1_555 1_555 1_555 1_555 yes
   ZR1     C4      C5      C1      -66.5(5) 1_555 1_555 1_555 1_555 yes
   ZR1     C4      C5      C100    -66.9(3) 1_555 1_555 1_555 1_555 yes
   ZR1     C4      C100    C1      89.7(8)  1_555 1_555 1_555 1_555 yes
   ZR1     C4      C100    C2      -88.9(8) 1_555 1_555 1_555 1_555 yes
   ZR1     C4      C100    C3      -90.2(5) 1_555 1_555 1_555 1_555 yes
   ZR1     C4      C100    C5      90.6(4)  1_555 1_555 1_555 1_555 yes
   ZR1     C5      C1      C2      -66.2(6) 1_555 1_555 1_555 1_555 yes
   ZR1     C5      C1      C100    -66.2(3) 1_555 1_555 1_555 1_555 yes
   ZR1     C5      C4      C3      67.6(6)  1_555 1_555 1_555 1_555 yes
   ZR1     C5      C4      C100    66.9(3)  1_555 1_555 1_555 1_555 yes
   ZR1     C5      C100    C1      90.5(4)  1_555 1_555 1_555 1_555 yes
   ZR1     C5      C100    C2      90.5(8)  1_555 1_555 1_555 1_555 yes
   ZR1     C5      C100    C3      -90.3(9) 1_555 1_555 1_555 1_555 yes
   ZR1     C5      C100    C4      -89.0(4) 1_555 1_555 1_555 1_555 yes
   ZR1     C6      C7      C8      67.0(5)  1_555 1_555 1_555 1_555 yes
   ZR1     C6      C7      C101    68.3(3)  1_555 1_555 1_555 1_555 yes
   ZR1     C6      C10     C9      -70.1(6) 1_555 1_555 1_555 1_555 yes
   ZR1     C6      C10     C101    -69.1(3) 1_555 1_555 1_555 1_555 yes
   ZR1     C6      C101    C7      -90.8(4) 1_555 1_555 1_555 1_555 yes
   ZR1     C6      C101    C8      -88.3(7) 1_555 1_555 1_555 1_555 yes
   ZR1     C6      C101    C9      91.3(8)  1_555 1_555 1_555 1_555 yes
   ZR1     C6      C101    C10     89.5(4)  1_555 1_555 1_555 1_555 yes
   ZR1     C7      C6      C10     -68.6(6) 1_555 1_555 1_555 1_555 yes
   ZR1     C7      C6      C101    -68.3(3) 1_555 1_555 1_555 1_555 yes
   ZR1     C7      C8      C9      68.4(5)  1_555 1_555 1_555 1_555 yes
   ZR1     C7      C8      C101    66.6(3)  1_555 1_555 1_555 1_555 yes
   ZR1     C7      C101    C6      87.5(4)  1_555 1_555 1_555 1_555 yes
   ZR1     C7      C101    C8      -91.0(4) 1_555 1_555 1_555 1_555 yes
   ZR1     C7      C101    C9      -94.7(8) 1_555 1_555 1_555 1_555 yes
   ZR1     C7      C101    C10     87.9(8)  1_555 1_555 1_555 1_555 yes
   ZR1     C8      C7      C6      -65.2(6) 1_555 1_555 1_555 1_555 yes
   ZR1     C8      C7      C101    -66.6(3) 1_555 1_555 1_555 1_555 yes
   ZR1     C8      C9      C10     63.5(6)  1_555 1_555 1_555 1_555 yes
   ZR1     C8      C9      C101    65.3(3)  1_555 1_555 1_555 1_555 yes
   ZR1     C8      C101    C6      87.2(8)  1_555 1_555 1_555 1_555 yes
   ZR1     C8      C101    C7      89.7(4)  1_555 1_555 1_555 1_555 yes
   ZR1     C8      C101    C9      -92.5(4) 1_555 1_555 1_555 1_555 yes
   ZR1     C8      C101    C10     -89.2(8) 1_555 1_555 1_555 1_555 yes
   ZR1     C9      C8      C7      -67.2(5) 1_555 1_555 1_555 1_555 yes
   ZR1     C9      C8      C101    -65.3(3) 1_555 1_555 1_555 1_555 yes
   ZR1     C9      C10     C6      67.2(6)  1_555 1_555 1_555 1_555 yes
   ZR1     C9      C10     C101    66.2(3)  1_555 1_555 1_555 1_555 yes
   ZR1     C9      C101    C6      -89.6(8) 1_555 1_555 1_555 1_555 yes
   ZR1     C9      C101    C7      93.8(8)  1_555 1_555 1_555 1_555 yes
   ZR1     C9      C101    C8      90.2(4)  1_555 1_555 1_555 1_555 yes
   ZR1     C9      C101    C10     -87.8(4) 1_555 1_555 1_555 1_555 yes
   ZR1     C10     C6      C7      69.4(6)  1_555 1_555 1_555 1_555 yes
   ZR1     C10     C6      C101    69.1(3)  1_555 1_555 1_555 1_555 yes
   ZR1     C10     C9      C8      -64.4(6) 1_555 1_555 1_555 1_555 yes
   ZR1     C10     C9      C101    -66.2(3) 1_555 1_555 1_555 1_555 yes
   ZR1     C10     C101    C6      -87.9(4) 1_555 1_555 1_555 1_555 yes
   ZR1     C10     C101    C7      -88.3(8) 1_555 1_555 1_555 1_555 yes
   ZR1     C10     C101    C8      89.9(8)  1_555 1_555 1_555 1_555 yes
   ZR1     C10     C101    C9      93.3(4)  1_555 1_555 1_555 1_555 yes
   ZR1     C11     N1      C20     164.9(7) 1_555 1_555 1_555 1_555 yes
   ZR1     C11     C12     C13     45.6(7)  1_555 1_555 1_555 1_555 yes
   ZR1     C11     C19     C18     -178(1)  1_555 1_555 1_555 1_555 yes
   ZR1     C12     C11     N1      -23.2(6) 1_555 1_555 1_555 1_555 yes
   ZR1     C12     C11     C19     157.5(6) 1_555 1_555 1_555 1_555 yes
   ZR1     C12     C13     C14     122.6(6) 1_555 1_555 1_555 1_555 yes
   ZR1     C13     C12     C11     -52.1(7) 1_555 1_555 1_555 1_555 yes
   ZR1     C13     C14     C15     143.8(5) 1_555 1_555 1_555 1_555 yes
   ZR1     C100    C1      C2      -89.9(5) 1_555 1_555 1_555 1_555 yes
   ZR1     C100    C1      C5      90.2(4)  1_555 1_555 1_555 1_555 yes
   ZR1     C100    C2      C1      90.5(4)  1_555 1_555 1_555 1_555 yes
   ZR1     C100    C2      C3      -89.9(5) 1_555 1_555 1_555 1_555 yes
   ZR1     C100    C3      C2      90.1(5)  1_555 1_555 1_555 1_555 yes
   ZR1     C100    C3      C4      -89.1(4) 1_555 1_555 1_555 1_555 yes
   ZR1     C100    C4      C3      90.2(5)  1_555 1_555 1_555 1_555 yes
   ZR1     C100    C4      C5      -90.6(4) 1_555 1_555 1_555 1_555 yes
   ZR1     C100    C5      C1      -90.5(4) 1_555 1_555 1_555 1_555 yes
   ZR1     C100    C5      C4      89.0(4)  1_555 1_555 1_555 1_555 yes
   ZR1     C101    C6      C7      90.8(4)  1_555 1_555 1_555 1_555 yes
   ZR1     C101    C6      C10     -89.5(4) 1_555 1_555 1_555 1_555 yes
   ZR1     C101    C7      C6      -87.5(4) 1_555 1_555 1_555 1_555 yes
   ZR1     C101    C7      C8      91.0(4)  1_555 1_555 1_555 1_555 yes
   ZR1     C101    C8      C7      -89.7(4) 1_555 1_555 1_555 1_555 yes
   ZR1     C101    C8      C9      92.5(4)  1_555 1_555 1_555 1_555 yes
   ZR1     C101    C9      C8      -90.2(4) 1_555 1_555 1_555 1_555 yes
   ZR1     C101    C9      C10     87.8(4)  1_555 1_555 1_555 1_555 yes
   ZR1     C101    C10     C6      87.9(4)  1_555 1_555 1_555 1_555 yes
   ZR1     C101    C10     C9      -93.3(4) 1_555 1_555 1_555 1_555 yes
   N1      ZR1     C1      C2      -91.7(5) 1_555 1_555 1_555 1_555 yes
   N1      ZR1     C1      C5      151.8(5) 1_555 1_555 1_555 1_555 yes
   N1      ZR1     C1      C100    -149.9(4) 1_555 1_555 1_555 1_555 yes
   N1      ZR1     C2      C1      81.7(5)  1_555 1_555 1_555 1_555 yes
   N1      ZR1     C2      C3      -165.0(5) 1_555 1_555 1_555 1_555 yes
   N1      ZR1     C2      C100    138.1(4) 1_555 1_555 1_555 1_555 yes
   N1      ZR1     C3      C2      15.9(6)  1_555 1_555 1_555 1_555 yes
   N1      ZR1     C3      C4      131.2(5) 1_555 1_555 1_555 1_555 yes
   N1      ZR1     C3      C100    73.5(4)  1_555 1_555 1_555 1_555 yes
   N1      ZR1     C4      C3      -64.8(6) 1_555 1_555 1_555 1_555 yes
   N1      ZR1     C4      C5      50.5(6)  1_555 1_555 1_555 1_555 yes
   N1      ZR1     C4      C100    -7.2(6)  1_555 1_555 1_555 1_555 yes
   N1      ZR1     C5      C1      -28.6(5) 1_555 1_555 1_555 1_555 yes
   N1      ZR1     C5      C4      -141.7(5) 1_555 1_555 1_555 1_555 yes
   N1      ZR1     C5      C100    -84.9(4) 1_555 1_555 1_555 1_555 yes
   N1      ZR1     C6      C7      -179.1(5) 1_555 1_555 1_555 1_555 yes
   N1      ZR1     C6      C10     -66.7(6) 1_555 1_555 1_555 1_555 yes
   N1      ZR1     C6      C101    -122.9(4) 1_555 1_555 1_555 1_555 yes
   N1      ZR1     C7      C6      1.3(8)   1_555 1_555 1_555 1_555 yes
   N1      ZR1     C7      C8      -114.5(6) 1_555 1_555 1_555 1_555 yes
   N1      ZR1     C7      C101    -57.1(7) 1_555 1_555 1_555 1_555 yes
   N1      ZR1     C8      C7      110.2(6) 1_555 1_555 1_555 1_555 yes
   N1      ZR1     C8      C9      -3.1(7)  1_555 1_555 1_555 1_555 yes
   N1      ZR1     C8      C101    52.7(6)  1_555 1_555 1_555 1_555 yes
   N1      ZR1     C9      C8      178.0(5) 1_555 1_555 1_555 1_555 yes
   N1      ZR1     C9      C10     61.6(5)  1_555 1_555 1_555 1_555 yes
   N1      ZR1     C9      C101    120.7(4) 1_555 1_555 1_555 1_555 yes
   N1      ZR1     C10     C6      120.5(5) 1_555 1_555 1_555 1_555 yes
   N1      ZR1     C10     C9      -125.3(5) 1_555 1_555 1_555 1_555 yes
   N1      ZR1     C10     C101    178.1(5) 1_555 1_555 1_555 1_555 yes
   N1      ZR1     C11     C12     -154.6(7) 1_555 1_555 1_555 1_555 yes
   N1      ZR1     C11     C19     90(1)    1_555 1_555 1_555 1_555 yes
   N1      ZR1     C12     C11     14.8(4)  1_555 1_555 1_555 1_555 yes
   N1      ZR1     C12     C13     -125.8(5) 1_555 1_555 1_555 1_555 yes
   N1      ZR1     C13     C12     45.4(4)  1_555 1_555 1_555 1_555 yes
   N1      ZR1     C13     C14     -66.0(6) 1_555 1_555 1_555 1_555 yes
   N1      ZR1     C100    C1      29.9(5)  1_555 1_555 1_555 1_555 yes
   N1      ZR1     C100    C2      -42.1(4) 1_555 1_555 1_555 1_555 yes
   N1      ZR1     C100    C3      -114.3(5) 1_555 1_555 1_555 1_555 yes
   N1      ZR1     C100    C4      174.3(5) 1_555 1_555 1_555 1_555 yes
   N1      ZR1     C100    C5      102.0(4) 1_555 1_555 1_555 1_555 yes
   N1      ZR1     C101    C6      70.6(6)  1_555 1_555 1_555 1_555 yes
   N1      ZR1     C101    C7      142.5(5) 1_555 1_555 1_555 1_555 yes
   N1      ZR1     C101    C8      -146.0(4) 1_555 1_555 1_555 1_555 yes
   N1      ZR1     C101    C9      -72.9(5) 1_555 1_555 1_555 1_555 yes
   N1      ZR1     C101    C10     -2.3(6)  1_555 1_555 1_555 1_555 yes
   N1      C11     ZR1     C1      40.3(5)  1_555 1_555 1_555 1_555 yes
   N1      C11     ZR1     C2      8.4(5)   1_555 1_555 1_555 1_555 yes
   N1      C11     ZR1     C3      -0.9(6)  1_555 1_555 1_555 1_555 yes
   N1      C11     ZR1     C4      58.1(7)  1_555 1_555 1_555 1_555 yes
   N1      C11     ZR1     C5      67.8(5)  1_555 1_555 1_555 1_555 yes
   N1      C11     ZR1     C6      -101.9(4) 1_555 1_555 1_555 1_555 yes
   N1      C11     ZR1     C7      -125.4(5) 1_555 1_555 1_555 1_555 yes
   N1      C11     ZR1     C8      -158.3(4) 1_555 1_555 1_555 1_555 yes
   N1      C11     ZR1     C9      -149.9(5) 1_555 1_555 1_555 1_555 yes
   N1      C11     ZR1     C10     -119.3(5) 1_555 1_555 1_555 1_555 yes
   N1      C11     ZR1     C12     154.6(7) 1_555 1_555 1_555 1_555 yes
   N1      C11     ZR1     C13     130.3(5) 1_555 1_555 1_555 1_555 yes
   N1      C11     ZR1     C100    34.4(5)  1_555 1_555 1_555 1_555 yes
   N1      C11     ZR1     C101    -131.2(4) 1_555 1_555 1_555 1_555 yes
   N1      C11     C12     C13     22(1)    1_555 1_555 1_555 1_555 yes
   N1      C11     C19     C18     -102.4(8) 1_555 1_555 1_555 1_555 yes
   N1      C20     C21     C22     -172.9(7) 1_555 1_555 1_555 1_555 yes
   N1      C20     C21     C26     8(1)     1_555 1_555 1_555 1_555 yes
   N1      C20     C25     C24     171.4(6) 1_555 1_555 1_555 1_555 yes
   N1      C20     C25     C27     -9(1)    1_555 1_555 1_555 1_555 yes
   C1      ZR1     N1      C11     -139.5(5) 1_555 1_555 1_555 1_555 yes
   C1      ZR1     N1      C20     60.3(7)  1_555 1_555 1_555 1_555 yes
   C1      ZR1     C2      C3      113.3(7) 1_555 1_555 1_555 1_555 yes
   C1      ZR1     C2      C100    56.5(5)  1_555 1_555 1_555 1_555 yes
   C1      ZR1     C3      C2      -37.7(5) 1_555 1_555 1_555 1_555 yes
   C1      ZR1     C3      C4      77.6(5)  1_555 1_555 1_555 1_555 yes
   C1      ZR1     C3      C100    19.9(4)  1_555 1_555 1_555 1_555 yes
   C1      ZR1     C4      C3      -77.4(5) 1_555 1_555 1_555 1_555 yes
   C1      ZR1     C4      C5      37.8(4)  1_555 1_555 1_555 1_555 yes
   C1      ZR1     C4      C100    -19.8(3) 1_555 1_555 1_555 1_555 yes
   C1      ZR1     C5      C4      -113.1(7) 1_555 1_555 1_555 1_555 yes
   C1      ZR1     C5      C100    -56.3(4) 1_555 1_555 1_555 1_555 yes
   C1      ZR1     C6      C7      88.9(6)  1_555 1_555 1_555 1_555 yes
   C1      ZR1     C6      C10     -158.6(5) 1_555 1_555 1_555 1_555 yes
   C1      ZR1     C6      C101    145.2(4) 1_555 1_555 1_555 1_555 yes
   C1      ZR1     C7      C6      -116.6(6) 1_555 1_555 1_555 1_555 yes
   C1      ZR1     C7      C8      127.5(5) 1_555 1_555 1_555 1_555 yes
   C1      ZR1     C7      C101    -175.1(4) 1_555 1_555 1_555 1_555 yes
   C1      ZR1     C8      C7      -78.5(6) 1_555 1_555 1_555 1_555 yes
   C1      ZR1     C8      C9      168.2(5) 1_555 1_555 1_555 1_555 yes
   C1      ZR1     C8      C101    -135.9(4) 1_555 1_555 1_555 1_555 yes
   C1      ZR1     C9      C8      -39(1)   1_555 1_555 1_555 1_555 yes
   C1      ZR1     C9      C10     -155(1)  1_555 1_555 1_555 1_555 yes
   C1      ZR1     C9      C101    -96(1)   1_555 1_555 1_555 1_555 yes
   C1      ZR1     C10     C6      51.2(9)  1_555 1_555 1_555 1_555 yes
   C1      ZR1     C10     C9      165.3(6) 1_555 1_555 1_555 1_555 yes
   C1      ZR1     C10     C101    108.7(7) 1_555 1_555 1_555 1_555 yes
   C1      ZR1     C11     C12     -114.4(5) 1_555 1_555 1_555 1_555 yes
   C1      ZR1     C11     C19     130(1)   1_555 1_555 1_555 1_555 yes
   C1      ZR1     C12     C11     74.7(5)  1_555 1_555 1_555 1_555 yes
   C1      ZR1     C12     C13     -66.0(5) 1_555 1_555 1_555 1_555 yes
   C1      ZR1     C13     C12     121.8(4) 1_555 1_555 1_555 1_555 yes
   C1      ZR1     C13     C14     10.4(6)  1_555 1_555 1_555 1_555 yes
   C1      ZR1     C100    C2      -72.0(5) 1_555 1_555 1_555 1_555 yes
   C1      ZR1     C100    C3      -144.2(6) 1_555 1_555 1_555 1_555 yes
   C1      ZR1     C100    C4      144.4(6) 1_555 1_555 1_555 1_555 yes
   C1      ZR1     C100    C5      72.0(5)  1_555 1_555 1_555 1_555 yes
   C1      ZR1     C101    C6      -63.2(7) 1_555 1_555 1_555 1_555 yes
   C1      ZR1     C101    C7      8.6(6)   1_555 1_555 1_555 1_555 yes
   C1      ZR1     C101    C8      80.2(6)  1_555 1_555 1_555 1_555 yes
   C1      ZR1     C101    C9      153.2(6) 1_555 1_555 1_555 1_555 yes
   C1      ZR1     C101    C10     -136.2(7) 1_555 1_555 1_555 1_555 yes
   C1      C2      ZR1     C3      -113.3(7) 1_555 1_555 1_555 1_555 yes
   C1      C2      ZR1     C4      -76.8(5) 1_555 1_555 1_555 1_555 yes
   C1      C2      ZR1     C5      -36.2(4) 1_555 1_555 1_555 1_555 yes
   C1      C2      ZR1     C6      -168.5(5) 1_555 1_555 1_555 1_555 yes
   C1      C2      ZR1     C7      -136.0(5) 1_555 1_555 1_555 1_555 yes
   C1      C2      ZR1     C8      -118.6(5) 1_555 1_555 1_555 1_555 yes
   C1      C2      ZR1     C9      -157.0(6) 1_555 1_555 1_555 1_555 yes
   C1      C2      ZR1     C10     171.7(4) 1_555 1_555 1_555 1_555 yes
   C1      C2      ZR1     C11     77.3(5)  1_555 1_555 1_555 1_555 yes
   C1      C2      ZR1     C12     53.3(6)  1_555 1_555 1_555 1_555 yes
   C1      C2      ZR1     C13     7.6(6)   1_555 1_555 1_555 1_555 yes
   C1      C2      ZR1     C100    -56.5(5) 1_555 1_555 1_555 1_555 yes
   C1      C2      ZR1     C101    -153.4(4) 1_555 1_555 1_555 1_555 yes
   C1      C2      C3      C4      1.1(10)  1_555 1_555 1_555 1_555 yes
   C1      C2      C3      C100    0.4(5)   1_555 1_555 1_555 1_555 yes
   C1      C2      C100    C3      -179.5(6) 1_555 1_555 1_555 1_555 yes
   C1      C2      C100    C4      179.2(8) 1_555 1_555 1_555 1_555 yes
   C1      C2      C100    C5      0(1)     1_555 1_555 1_555 1_555 yes
   C1      C5      ZR1     C2      36.1(4)  1_555 1_555 1_555 1_555 yes
   C1      C5      ZR1     C3      76.6(5)  1_555 1_555 1_555 1_555 yes
   C1      C5      ZR1     C4      113.1(7) 1_555 1_555 1_555 1_555 yes
   C1      C5      ZR1     C6      108.5(5) 1_555 1_555 1_555 1_555 yes
   C1      C5      ZR1     C7      131.5(5) 1_555 1_555 1_555 1_555 yes
   C1      C5      ZR1     C8      164.1(5) 1_555 1_555 1_555 1_555 yes
   C1      C5      ZR1     C9      -177.9(4) 1_555 1_555 1_555 1_555 yes
   C1      C5      ZR1     C10     140.4(8) 1_555 1_555 1_555 1_555 yes
   C1      C5      ZR1     C11     -58.6(5) 1_555 1_555 1_555 1_555 yes
   C1      C5      ZR1     C12     -93.1(5) 1_555 1_555 1_555 1_555 yes
   C1      C5      ZR1     C13     -110.3(5) 1_555 1_555 1_555 1_555 yes
   C1      C5      ZR1     C100    56.3(4)  1_555 1_555 1_555 1_555 yes
   C1      C5      ZR1     C101    145.7(4) 1_555 1_555 1_555 1_555 yes
   C1      C5      C4      C3      1.2(9)   1_555 1_555 1_555 1_555 yes
   C1      C5      C4      C100    0.5(5)   1_555 1_555 1_555 1_555 yes
   C1      C5      C100    C2      0(1)     1_555 1_555 1_555 1_555 yes
   C1      C5      C100    C3      179.2(9) 1_555 1_555 1_555 1_555 yes
   C1      C5      C100    C4      -179.5(6) 1_555 1_555 1_555 1_555 yes
   C1      C100    ZR1     C2      72.0(5)  1_555 1_555 1_555 1_555 yes
   C1      C100    ZR1     C3      144.2(6) 1_555 1_555 1_555 1_555 yes
   C1      C100    ZR1     C4      -144.4(6) 1_555 1_555 1_555 1_555 yes
   C1      C100    ZR1     C5      -72.0(5) 1_555 1_555 1_555 1_555 yes
   C1      C100    ZR1     C6      147.8(5) 1_555 1_555 1_555 1_555 yes
   C1      C100    ZR1     C7      177.6(5) 1_555 1_555 1_555 1_555 yes
   C1      C100    ZR1     C8      -155.1(5) 1_555 1_555 1_555 1_555 yes
   C1      C100    ZR1     C9      -160.0(6) 1_555 1_555 1_555 1_555 yes
   C1      C100    ZR1     C10     146.3(5) 1_555 1_555 1_555 1_555 yes
   C1      C100    ZR1     C11     12.5(5)  1_555 1_555 1_555 1_555 yes
   C1      C100    ZR1     C12     -28.8(5) 1_555 1_555 1_555 1_555 yes
   C1      C100    ZR1     C13     -57.7(5) 1_555 1_555 1_555 1_555 yes
   C1      C100    ZR1     C101    175.6(4) 1_555 1_555 1_555 1_555 yes
   C1      C100    C2      C3      179.5(6) 1_555 1_555 1_555 1_555 yes
   C1      C100    C3      C2      0(1)     1_555 1_555 1_555 1_555 yes
   C1      C100    C3      C4      -179.9(8) 1_555 1_555 1_555 1_555 yes
   C1      C100    C4      C3      179.9(8) 1_555 1_555 1_555 1_555 yes
   C1      C100    C4      C5      -0.9(10) 1_555 1_555 1_555 1_555 yes
   C1      C100    C5      C4      179.5(6) 1_555 1_555 1_555 1_555 yes
   C2      ZR1     N1      C11     -172.0(5) 1_555 1_555 1_555 1_555 yes
   C2      ZR1     N1      C20     27.7(7)  1_555 1_555 1_555 1_555 yes
   C2      ZR1     C1      C5      -116.5(7) 1_555 1_555 1_555 1_555 yes
   C2      ZR1     C1      C100    -58.2(4) 1_555 1_555 1_555 1_555 yes
   C2      ZR1     C3      C4      115.3(7) 1_555 1_555 1_555 1_555 yes
   C2      ZR1     C3      C100    57.7(5)  1_555 1_555 1_555 1_555 yes
   C2      ZR1     C4      C3      -37.0(5) 1_555 1_555 1_555 1_555 yes
   C2      ZR1     C4      C5      78.2(5)  1_555 1_555 1_555 1_555 yes
   C2      ZR1     C4      C100    20.5(3)  1_555 1_555 1_555 1_555 yes
   C2      ZR1     C5      C4      -77.0(5) 1_555 1_555 1_555 1_555 yes
   C2      ZR1     C5      C100    -20.2(3) 1_555 1_555 1_555 1_555 yes
   C2      ZR1     C6      C7      97.2(5)  1_555 1_555 1_555 1_555 yes
   C2      ZR1     C6      C10     -150.3(5) 1_555 1_555 1_555 1_555 yes
   C2      ZR1     C6      C101    153.5(5) 1_555 1_555 1_555 1_555 yes
   C2      ZR1     C7      C6      -90.0(6) 1_555 1_555 1_555 1_555 yes
   C2      ZR1     C7      C8      154.2(5) 1_555 1_555 1_555 1_555 yes
   C2      ZR1     C7      C101    -148.4(4) 1_555 1_555 1_555 1_555 yes
   C2      ZR1     C8      C7      -34.0(6) 1_555 1_555 1_555 1_555 yes
   C2      ZR1     C8      C9      -147.3(5) 1_555 1_555 1_555 1_555 yes
   C2      ZR1     C8      C101    -91.4(4) 1_555 1_555 1_555 1_555 yes
   C2      ZR1     C9      C8      63.9(9)  1_555 1_555 1_555 1_555 yes
   C2      ZR1     C9      C10     -52.5(9) 1_555 1_555 1_555 1_555 yes
   C2      ZR1     C9      C101    6.5(9)   1_555 1_555 1_555 1_555 yes
   C2      ZR1     C10     C6      38.3(6)  1_555 1_555 1_555 1_555 yes
   C2      ZR1     C10     C9      152.5(5) 1_555 1_555 1_555 1_555 yes
   C2      ZR1     C10     C101    95.9(5)  1_555 1_555 1_555 1_555 yes
   C2      ZR1     C11     C12     -146.2(4) 1_555 1_555 1_555 1_555 yes
   C2      ZR1     C11     C19     99(1)    1_555 1_555 1_555 1_555 yes
   C2      ZR1     C12     C11     47.3(6)  1_555 1_555 1_555 1_555 yes
   C2      ZR1     C12     C13     -93.3(5) 1_555 1_555 1_555 1_555 yes
   C2      ZR1     C13     C12     117.8(4) 1_555 1_555 1_555 1_555 yes
   C2      ZR1     C13     C14     6.4(7)   1_555 1_555 1_555 1_555 yes
   C2      ZR1     C100    C3      -72.2(5) 1_555 1_555 1_555 1_555 yes
   C2      ZR1     C100    C4      -143.6(6) 1_555 1_555 1_555 1_555 yes
   C2      ZR1     C100    C5      144.0(5) 1_555 1_555 1_555 1_555 yes
   C2      ZR1     C101    C6      -32.8(6) 1_555 1_555 1_555 1_555 yes
   C2      ZR1     C101    C7      39.0(5)  1_555 1_555 1_555 1_555 yes
   C2      ZR1     C101    C8      110.6(5) 1_555 1_555 1_555 1_555 yes
   C2      ZR1     C101    C9      -176.3(5) 1_555 1_555 1_555 1_555 yes
   C2      ZR1     C101    C10     -105.7(6) 1_555 1_555 1_555 1_555 yes
   C2      C1      ZR1     C3      38.0(5)  1_555 1_555 1_555 1_555 yes
   C2      C1      ZR1     C4      78.3(5)  1_555 1_555 1_555 1_555 yes
   C2      C1      ZR1     C5      116.5(7) 1_555 1_555 1_555 1_555 yes
   C2      C1      ZR1     C6      15.4(6)  1_555 1_555 1_555 1_555 yes
   C2      C1      ZR1     C7      55.3(6)  1_555 1_555 1_555 1_555 yes
   C2      C1      ZR1     C8      93.5(6)  1_555 1_555 1_555 1_555 yes
   C2      C1      ZR1     C9      123(1)   1_555 1_555 1_555 1_555 yes
   C2      C1      ZR1     C10     -19.1(10) 1_555 1_555 1_555 1_555 yes
   C2      C1      ZR1     C11     -111.9(5) 1_555 1_555 1_555 1_555 yes
   C2      C1      ZR1     C12     -142.4(4) 1_555 1_555 1_555 1_555 yes
   C2      C1      ZR1     C13     -174.0(5) 1_555 1_555 1_555 1_555 yes
   C2      C1      ZR1     C100    58.2(4)  1_555 1_555 1_555 1_555 yes
   C2      C1      ZR1     C101    50.4(7)  1_555 1_555 1_555 1_555 yes
   C2      C1      C5      C4      -0.5(9)  1_555 1_555 1_555 1_555 yes
   C2      C1      C5      C100    -0.0(5)  1_555 1_555 1_555 1_555 yes
   C2      C1      C100    C3      0(1)     1_555 1_555 1_555 1_555 yes
   C2      C1      C100    C4      -179.2(8) 1_555 1_555 1_555 1_555 yes
   C2      C1      C100    C5      179.9(6) 1_555 1_555 1_555 1_555 yes
   C2      C3      ZR1     C4      -115.3(7) 1_555 1_555 1_555 1_555 yes
   C2      C3      ZR1     C5      -78.2(5) 1_555 1_555 1_555 1_555 yes
   C2      C3      ZR1     C6      125.7(6) 1_555 1_555 1_555 1_555 yes
   C2      C3      ZR1     C7      157.0(6) 1_555 1_555 1_555 1_555 yes
   C2      C3      ZR1     C8      175.9(5) 1_555 1_555 1_555 1_555 yes
   C2      C3      ZR1     C9      157.4(5) 1_555 1_555 1_555 1_555 yes
   C2      C3      ZR1     C10     123.8(5) 1_555 1_555 1_555 1_555 yes
   C2      C3      ZR1     C11     16.4(7)  1_555 1_555 1_555 1_555 yes
   C2      C3      ZR1     C12     -39(1)   1_555 1_555 1_555 1_555 yes
   C2      C3      ZR1     C13     -88.2(6) 1_555 1_555 1_555 1_555 yes
   C2      C3      ZR1     C100    -57.7(5) 1_555 1_555 1_555 1_555 yes
   C2      C3      ZR1     C101    148.2(5) 1_555 1_555 1_555 1_555 yes
   C2      C3      C4      C5      -1.4(10) 1_555 1_555 1_555 1_555 yes
   C2      C3      C4      C100    -0.7(6)  1_555 1_555 1_555 1_555 yes
   C2      C3      C100    C4      179.2(6) 1_555 1_555 1_555 1_555 yes
   C2      C3      C100    C5      -179.5(8) 1_555 1_555 1_555 1_555 yes
   C2      C100    ZR1     C3      72.2(5)  1_555 1_555 1_555 1_555 yes
   C2      C100    ZR1     C4      143.6(6) 1_555 1_555 1_555 1_555 yes
   C2      C100    ZR1     C5      -144.0(5) 1_555 1_555 1_555 1_555 yes
   C2      C100    ZR1     C6      75.8(4)  1_555 1_555 1_555 1_555 yes
   C2      C100    ZR1     C7      105.6(4) 1_555 1_555 1_555 1_555 yes
   C2      C100    ZR1     C8      132.9(4) 1_555 1_555 1_555 1_555 yes
   C2      C100    ZR1     C9      128.0(5) 1_555 1_555 1_555 1_555 yes
   C2      C100    ZR1     C10     74.3(5)  1_555 1_555 1_555 1_555 yes
   C2      C100    ZR1     C11     -59.5(4) 1_555 1_555 1_555 1_555 yes
   C2      C100    ZR1     C12     -100.8(5) 1_555 1_555 1_555 1_555 yes
   C2      C100    ZR1     C13     -129.7(4) 1_555 1_555 1_555 1_555 yes
   C2      C100    ZR1     C101    103.6(4) 1_555 1_555 1_555 1_555 yes
   C2      C100    C1      C5      -179.9(6) 1_555 1_555 1_555 1_555 yes
   C2      C100    C3      C4      -179.2(6) 1_555 1_555 1_555 1_555 yes
   C2      C100    C4      C3      1(1)     1_555 1_555 1_555 1_555 yes
   C2      C100    C4      C5      -179.5(9) 1_555 1_555 1_555 1_555 yes
   C2      C100    C5      C4      179.5(9) 1_555 1_555 1_555 1_555 yes
   C3      ZR1     N1      C11     179.4(4) 1_555 1_555 1_555 1_555 yes
   C3      ZR1     N1      C20     19.1(8)  1_555 1_555 1_555 1_555 yes
   C3      ZR1     C1      C5      -78.5(5) 1_555 1_555 1_555 1_555 yes
   C3      ZR1     C1      C100    -20.2(4) 1_555 1_555 1_555 1_555 yes
   C3      ZR1     C2      C100    -56.9(5) 1_555 1_555 1_555 1_555 yes
   C3      ZR1     C4      C5      115.2(7) 1_555 1_555 1_555 1_555 yes
   C3      ZR1     C4      C100    57.6(5)  1_555 1_555 1_555 1_555 yes
   C3      ZR1     C5      C4      -36.5(4) 1_555 1_555 1_555 1_555 yes
   C3      ZR1     C5      C100    20.3(3)  1_555 1_555 1_555 1_555 yes
   C3      ZR1     C6      C7      70.9(6)  1_555 1_555 1_555 1_555 yes
   C3      ZR1     C6      C10     -176.6(6) 1_555 1_555 1_555 1_555 yes
   C3      ZR1     C6      C101    127.2(5) 1_555 1_555 1_555 1_555 yes
   C3      ZR1     C7      C6      -102.4(6) 1_555 1_555 1_555 1_555 yes
   C3      ZR1     C7      C8      141.8(6) 1_555 1_555 1_555 1_555 yes
   C3      ZR1     C7      C101    -160.8(5) 1_555 1_555 1_555 1_555 yes
   C3      ZR1     C8      C7      -36.9(5) 1_555 1_555 1_555 1_555 yes
   C3      ZR1     C8      C9      -150.2(5) 1_555 1_555 1_555 1_555 yes
   C3      ZR1     C8      C101    -94.3(4) 1_555 1_555 1_555 1_555 yes
   C3      ZR1     C9      C8      37.0(6)  1_555 1_555 1_555 1_555 yes
   C3      ZR1     C9      C10     -79.4(6) 1_555 1_555 1_555 1_555 yes
   C3      ZR1     C9      C101    -20.4(6) 1_555 1_555 1_555 1_555 yes
   C3      ZR1     C10     C6      3.7(6)   1_555 1_555 1_555 1_555 yes
   C3      ZR1     C10     C9      117.9(6) 1_555 1_555 1_555 1_555 yes
   C3      ZR1     C10     C101    61.2(6)  1_555 1_555 1_555 1_555 yes
   C3      ZR1     C11     C12     -155.5(5) 1_555 1_555 1_555 1_555 yes
   C3      ZR1     C11     C19     89(1)    1_555 1_555 1_555 1_555 yes
   C3      ZR1     C12     C11     75(1)    1_555 1_555 1_555 1_555 yes
   C3      ZR1     C12     C13     -64(1)   1_555 1_555 1_555 1_555 yes
   C3      ZR1     C13     C12     160.0(4) 1_555 1_555 1_555 1_555 yes
   C3      ZR1     C13     C14     48.5(7)  1_555 1_555 1_555 1_555 yes
   C3      ZR1     C100    C4      -71.4(5) 1_555 1_555 1_555 1_555 yes
   C3      ZR1     C100    C5      -143.7(6) 1_555 1_555 1_555 1_555 yes
   C3      ZR1     C101    C6      -53.2(6) 1_555 1_555 1_555 1_555 yes
   C3      ZR1     C101    C7      18.6(5)  1_555 1_555 1_555 1_555 yes
   C3      ZR1     C101    C8      90.2(5)  1_555 1_555 1_555 1_555 yes
   C3      ZR1     C101    C9      163.2(5) 1_555 1_555 1_555 1_555 yes
   C3      ZR1     C101    C10     -126.1(6) 1_555 1_555 1_555 1_555 yes
   C3      C2      ZR1     C4      36.5(5)  1_555 1_555 1_555 1_555 yes
   C3      C2      ZR1     C5      77.1(5)  1_555 1_555 1_555 1_555 yes
   C3      C2      ZR1     C6      -55.2(6) 1_555 1_555 1_555 1_555 yes
   C3      C2      ZR1     C7      -22.7(6) 1_555 1_555 1_555 1_555 yes
   C3      C2      ZR1     C8      -5.3(7)  1_555 1_555 1_555 1_555 yes
   C3      C2      ZR1     C9      -43.7(9) 1_555 1_555 1_555 1_555 yes
   C3      C2      ZR1     C10     -75.0(6) 1_555 1_555 1_555 1_555 yes
   C3      C2      ZR1     C11     -169.4(5) 1_555 1_555 1_555 1_555 yes
   C3      C2      ZR1     C12     166.6(5) 1_555 1_555 1_555 1_555 yes
   C3      C2      ZR1     C13     120.9(5) 1_555 1_555 1_555 1_555 yes
   C3      C2      ZR1     C100    56.9(5)  1_555 1_555 1_555 1_555 yes
   C3      C2      ZR1     C101    -40.0(6) 1_555 1_555 1_555 1_555 yes
   C3      C2      C1      C5      -0.3(10) 1_555 1_555 1_555 1_555 yes
   C3      C2      C1      C100    -0.4(5)  1_555 1_555 1_555 1_555 yes
   C3      C2      C100    C4      -1(1)    1_555 1_555 1_555 1_555 yes
   C3      C2      C100    C5      179.5(8) 1_555 1_555 1_555 1_555 yes
   C3      C4      ZR1     C5      -115.2(7) 1_555 1_555 1_555 1_555 yes
   C3      C4      ZR1     C6      61.2(5)  1_555 1_555 1_555 1_555 yes
   C3      C4      ZR1     C7      83.1(5)  1_555 1_555 1_555 1_555 yes
   C3      C4      ZR1     C8      112.6(5) 1_555 1_555 1_555 1_555 yes
   C3      C4      ZR1     C9      112.4(5) 1_555 1_555 1_555 1_555 yes
   C3      C4      ZR1     C10     77.3(6)  1_555 1_555 1_555 1_555 yes
   C3      C4      ZR1     C11     -99.6(7) 1_555 1_555 1_555 1_555 yes
   C3      C4      ZR1     C12     -155.9(5) 1_555 1_555 1_555 1_555 yes
   C3      C4      ZR1     C13     -160.9(5) 1_555 1_555 1_555 1_555 yes
   C3      C4      ZR1     C100    -57.6(5) 1_555 1_555 1_555 1_555 yes
   C3      C4      ZR1     C101    89.6(5)  1_555 1_555 1_555 1_555 yes
   C3      C4      C5      C100    0.7(5)   1_555 1_555 1_555 1_555 yes
   C3      C4      C100    C5      -179.2(6) 1_555 1_555 1_555 1_555 yes
   C3      C100    ZR1     C4      71.4(5)  1_555 1_555 1_555 1_555 yes
   C3      C100    ZR1     C5      143.7(6) 1_555 1_555 1_555 1_555 yes
   C3      C100    ZR1     C6      3.6(5)   1_555 1_555 1_555 1_555 yes
   C3      C100    ZR1     C7      33.3(5)  1_555 1_555 1_555 1_555 yes
   C3      C100    ZR1     C8      60.7(5)  1_555 1_555 1_555 1_555 yes
   C3      C100    ZR1     C9      55.7(6)  1_555 1_555 1_555 1_555 yes
   C3      C100    ZR1     C10     2.1(5)   1_555 1_555 1_555 1_555 yes
   C3      C100    ZR1     C11     -131.8(5) 1_555 1_555 1_555 1_555 yes
   C3      C100    ZR1     C12     -173.0(5) 1_555 1_555 1_555 1_555 yes
   C3      C100    ZR1     C13     158.1(5) 1_555 1_555 1_555 1_555 yes
   C3      C100    ZR1     C101    31.4(4)  1_555 1_555 1_555 1_555 yes
   C3      C100    C1      C5      -179.2(9) 1_555 1_555 1_555 1_555 yes
   C3      C100    C4      C5      179.2(6) 1_555 1_555 1_555 1_555 yes
   C3      C100    C5      C4      -1(1)    1_555 1_555 1_555 1_555 yes
   C4      ZR1     N1      C11     -149.8(4) 1_555 1_555 1_555 1_555 yes
   C4      ZR1     N1      C20     49.9(8)  1_555 1_555 1_555 1_555 yes
   C4      ZR1     C1      C5      -38.2(4) 1_555 1_555 1_555 1_555 yes
   C4      ZR1     C1      C100    20.1(3)  1_555 1_555 1_555 1_555 yes
   C4      ZR1     C2      C100    -20.4(3) 1_555 1_555 1_555 1_555 yes
   C4      ZR1     C3      C100    -57.7(5) 1_555 1_555 1_555 1_555 yes
   C4      ZR1     C5      C100    56.8(5)  1_555 1_555 1_555 1_555 yes
   C4      ZR1     C6      C7      43.1(6)  1_555 1_555 1_555 1_555 yes
   C4      ZR1     C6      C10     155.6(5) 1_555 1_555 1_555 1_555 yes
   C4      ZR1     C6      C101    99.4(5)  1_555 1_555 1_555 1_555 yes
   C4      ZR1     C7      C6      -135.5(6) 1_555 1_555 1_555 1_555 yes
   C4      ZR1     C7      C8      108.7(6) 1_555 1_555 1_555 1_555 yes
   C4      ZR1     C7      C101    166.1(5) 1_555 1_555 1_555 1_555 yes
   C4      ZR1     C8      C7      -66.4(5) 1_555 1_555 1_555 1_555 yes
   C4      ZR1     C8      C9      -179.7(6) 1_555 1_555 1_555 1_555 yes
   C4      ZR1     C8      C101    -123.8(4) 1_555 1_555 1_555 1_555 yes
   C4      ZR1     C9      C8      0.4(6)   1_555 1_555 1_555 1_555 yes
   C4      ZR1     C9      C10     -116.0(6) 1_555 1_555 1_555 1_555 yes
   C4      ZR1     C9      C101    -57.0(5) 1_555 1_555 1_555 1_555 yes
   C4      ZR1     C10     C6      -30.8(7) 1_555 1_555 1_555 1_555 yes
   C4      ZR1     C10     C9      83.3(6)  1_555 1_555 1_555 1_555 yes
   C4      ZR1     C10     C101    26.7(7)  1_555 1_555 1_555 1_555 yes
   C4      ZR1     C11     C12     -96.5(7) 1_555 1_555 1_555 1_555 yes
   C4      ZR1     C11     C19     148(1)   1_555 1_555 1_555 1_555 yes
   C4      ZR1     C12     C11     132.2(5) 1_555 1_555 1_555 1_555 yes
   C4      ZR1     C12     C13     -8.4(6)  1_555 1_555 1_555 1_555 yes
   C4      ZR1     C13     C12     174.6(4) 1_555 1_555 1_555 1_555 yes
   C4      ZR1     C13     C14     63.2(6)  1_555 1_555 1_555 1_555 yes
   C4      ZR1     C100    C5      -72.4(5) 1_555 1_555 1_555 1_555 yes
   C4      ZR1     C101    C6      -85.6(6) 1_555 1_555 1_555 1_555 yes
   C4      ZR1     C101    C7      -13.7(5) 1_555 1_555 1_555 1_555 yes
   C4      ZR1     C101    C8      57.8(5)  1_555 1_555 1_555 1_555 yes
   C4      ZR1     C101    C9      130.9(5) 1_555 1_555 1_555 1_555 yes
   C4      ZR1     C101    C10     -158.5(6) 1_555 1_555 1_555 1_555 yes
   C4      C3      ZR1     C5      37.2(5)  1_555 1_555 1_555 1_555 yes
   C4      C3      ZR1     C6      -118.9(5) 1_555 1_555 1_555 1_555 yes
   C4      C3      ZR1     C7      -87.7(5) 1_555 1_555 1_555 1_555 yes
   C4      C3      ZR1     C8      -68.7(5) 1_555 1_555 1_555 1_555 yes
   C4      C3      ZR1     C9      -87.3(5) 1_555 1_555 1_555 1_555 yes
   C4      C3      ZR1     C10     -120.9(5) 1_555 1_555 1_555 1_555 yes
   C4      C3      ZR1     C11     131.7(5) 1_555 1_555 1_555 1_555 yes
   C4      C3      ZR1     C12     76(1)    1_555 1_555 1_555 1_555 yes
   C4      C3      ZR1     C13     27.2(7)  1_555 1_555 1_555 1_555 yes
   C4      C3      ZR1     C100    57.7(5)  1_555 1_555 1_555 1_555 yes
   C4      C3      ZR1     C101    -96.5(5) 1_555 1_555 1_555 1_555 yes
   C4      C3      C2      C100    0.7(6)   1_555 1_555 1_555 1_555 yes
   C4      C3      C100    C5      1(1)     1_555 1_555 1_555 1_555 yes
   C4      C5      ZR1     C6      -4.6(6)  1_555 1_555 1_555 1_555 yes
   C4      C5      ZR1     C7      18.4(5)  1_555 1_555 1_555 1_555 yes
   C4      C5      ZR1     C8      51.0(5)  1_555 1_555 1_555 1_555 yes
   C4      C5      ZR1     C9      69.0(6)  1_555 1_555 1_555 1_555 yes
   C4      C5      ZR1     C10     27(1)    1_555 1_555 1_555 1_555 yes
   C4      C5      ZR1     C11     -171.7(5) 1_555 1_555 1_555 1_555 yes
   C4      C5      ZR1     C12     153.8(5) 1_555 1_555 1_555 1_555 yes
   C4      C5      ZR1     C13     136.6(5) 1_555 1_555 1_555 1_555 yes
   C4      C5      ZR1     C100    -56.8(5) 1_555 1_555 1_555 1_555 yes
   C4      C5      ZR1     C101    32.6(5)  1_555 1_555 1_555 1_555 yes
   C4      C5      C1      C100    -0.5(5)  1_555 1_555 1_555 1_555 yes
   C4      C100    ZR1     C5      72.4(5)  1_555 1_555 1_555 1_555 yes
   C4      C100    ZR1     C6      -67.8(5) 1_555 1_555 1_555 1_555 yes
   C4      C100    ZR1     C7      -38.0(5) 1_555 1_555 1_555 1_555 yes
   C4      C100    ZR1     C8      -10.7(5) 1_555 1_555 1_555 1_555 yes
   C4      C100    ZR1     C9      -15.6(6) 1_555 1_555 1_555 1_555 yes
   C4      C100    ZR1     C10     -69.3(6) 1_555 1_555 1_555 1_555 yes
   C4      C100    ZR1     C11     156.9(5) 1_555 1_555 1_555 1_555 yes
   C4      C100    ZR1     C12     115.6(5) 1_555 1_555 1_555 1_555 yes
   C4      C100    ZR1     C13     86.7(5)  1_555 1_555 1_555 1_555 yes
   C4      C100    ZR1     C101    -40.0(5) 1_555 1_555 1_555 1_555 yes
   C4      C100    C1      C5      0.9(10)  1_555 1_555 1_555 1_555 yes
   C5      ZR1     N1      C11     -124.3(4) 1_555 1_555 1_555 1_555 yes
   C5      ZR1     N1      C20     75.4(7)  1_555 1_555 1_555 1_555 yes
   C5      ZR1     C1      C100    58.3(5)  1_555 1_555 1_555 1_555 yes
   C5      ZR1     C2      C100    20.3(3)  1_555 1_555 1_555 1_555 yes
   C5      ZR1     C3      C100    -20.5(3) 1_555 1_555 1_555 1_555 yes
   C5      ZR1     C4      C100    -57.7(5) 1_555 1_555 1_555 1_555 yes
   C5      ZR1     C6      C7      45.6(6)  1_555 1_555 1_555 1_555 yes
   C5      ZR1     C6      C10     158.1(5) 1_555 1_555 1_555 1_555 yes
   C5      ZR1     C6      C101    101.9(5) 1_555 1_555 1_555 1_555 yes
   C5      ZR1     C7      C6      -145.6(5) 1_555 1_555 1_555 1_555 yes
   C5      ZR1     C7      C8      98.6(5)  1_555 1_555 1_555 1_555 yes
   C5      ZR1     C7      C101    156.0(4) 1_555 1_555 1_555 1_555 yes
   C5      ZR1     C8      C7      -91.1(5) 1_555 1_555 1_555 1_555 yes
   C5      ZR1     C8      C9      155.6(5) 1_555 1_555 1_555 1_555 yes
   C5      ZR1     C8      C101    -148.5(4) 1_555 1_555 1_555 1_555 yes
   C5      ZR1     C9      C8      -34.2(7) 1_555 1_555 1_555 1_555 yes
   C5      ZR1     C9      C10     -150.6(5) 1_555 1_555 1_555 1_555 yes
   C5      ZR1     C9      C101    -91.6(5) 1_555 1_555 1_555 1_555 yes
   C5      ZR1     C10     C6      -48(1)   1_555 1_555 1_555 1_555 yes
   C5      ZR1     C10     C9      65(1)    1_555 1_555 1_555 1_555 yes
   C5      ZR1     C10     C101    8(1)     1_555 1_555 1_555 1_555 yes
   C5      ZR1     C11     C12     -86.8(5) 1_555 1_555 1_555 1_555 yes
   C5      ZR1     C11     C19     158(1)   1_555 1_555 1_555 1_555 yes
   C5      ZR1     C12     C11     109.6(5) 1_555 1_555 1_555 1_555 yes
   C5      ZR1     C12     C13     -31.0(5) 1_555 1_555 1_555 1_555 yes
   C5      ZR1     C13     C12     151.9(4) 1_555 1_555 1_555 1_555 yes
   C5      ZR1     C13     C14     40.5(6)  1_555 1_555 1_555 1_555 yes
   C5      ZR1     C101    C6      -102.8(6) 1_555 1_555 1_555 1_555 yes
   C5      ZR1     C101    C7      -30.9(5) 1_555 1_555 1_555 1_555 yes
   C5      ZR1     C101    C8      40.7(5)  1_555 1_555 1_555 1_555 yes
   C5      ZR1     C101    C9      113.7(5) 1_555 1_555 1_555 1_555 yes
   C5      ZR1     C101    C10     -175.7(6) 1_555 1_555 1_555 1_555 yes
   C5      C1      ZR1     C6      -101.0(6) 1_555 1_555 1_555 1_555 yes
   C5      C1      ZR1     C7      -61.2(6) 1_555 1_555 1_555 1_555 yes
   C5      C1      ZR1     C8      -23.0(7) 1_555 1_555 1_555 1_555 yes
   C5      C1      ZR1     C9      7(1)     1_555 1_555 1_555 1_555 yes
   C5      C1      ZR1     C10     -135.6(7) 1_555 1_555 1_555 1_555 yes
   C5      C1      ZR1     C11     131.6(5) 1_555 1_555 1_555 1_555 yes
   C5      C1      ZR1     C12     101.1(5) 1_555 1_555 1_555 1_555 yes
   C5      C1      ZR1     C13     69.6(5)  1_555 1_555 1_555 1_555 yes
   C5      C1      ZR1     C100    -58.3(5) 1_555 1_555 1_555 1_555 yes
   C5      C1      ZR1     C101    -66.0(7) 1_555 1_555 1_555 1_555 yes
   C5      C1      C2      C100    0.0(5)   1_555 1_555 1_555 1_555 yes
   C5      C4      ZR1     C6      176.5(5) 1_555 1_555 1_555 1_555 yes
   C5      C4      ZR1     C7      -161.7(5) 1_555 1_555 1_555 1_555 yes
   C5      C4      ZR1     C8      -132.1(5) 1_555 1_555 1_555 1_555 yes
   C5      C4      ZR1     C9      -132.3(5) 1_555 1_555 1_555 1_555 yes
   C5      C4      ZR1     C10     -167.5(5) 1_555 1_555 1_555 1_555 yes
   C5      C4      ZR1     C11     15.6(9)  1_555 1_555 1_555 1_555 yes
   C5      C4      ZR1     C12     -40.7(6) 1_555 1_555 1_555 1_555 yes
   C5      C4      ZR1     C13     -45.7(5) 1_555 1_555 1_555 1_555 yes
   C5      C4      ZR1     C100    57.7(5)  1_555 1_555 1_555 1_555 yes
   C5      C4      ZR1     C101    -155.1(4) 1_555 1_555 1_555 1_555 yes
   C5      C4      C3      C100    -0.7(5)  1_555 1_555 1_555 1_555 yes
   C5      C100    ZR1     C6      -140.1(5) 1_555 1_555 1_555 1_555 yes
   C5      C100    ZR1     C7      -110.4(5) 1_555 1_555 1_555 1_555 yes
   C5      C100    ZR1     C8      -83.1(4) 1_555 1_555 1_555 1_555 yes
   C5      C100    ZR1     C9      -88.0(5) 1_555 1_555 1_555 1_555 yes
   C5      C100    ZR1     C10     -141.6(5) 1_555 1_555 1_555 1_555 yes
   C5      C100    ZR1     C11     84.5(5)  1_555 1_555 1_555 1_555 yes
   C5      C100    ZR1     C12     43.3(5)  1_555 1_555 1_555 1_555 yes
   C5      C100    ZR1     C13     14.3(5)  1_555 1_555 1_555 1_555 yes
   C5      C100    ZR1     C101    -112.4(4) 1_555 1_555 1_555 1_555 yes
   C6      ZR1     N1      C11     89.4(5)  1_555 1_555 1_555 1_555 yes
   C6      ZR1     N1      C20     -70.9(8) 1_555 1_555 1_555 1_555 yes
   C6      ZR1     C1      C100    -42.8(6) 1_555 1_555 1_555 1_555 yes
   C6      ZR1     C2      C100    -112.0(4) 1_555 1_555 1_555 1_555 yes
   C6      ZR1     C3      C100    -176.6(5) 1_555 1_555 1_555 1_555 yes
   C6      ZR1     C4      C100    118.8(4) 1_555 1_555 1_555 1_555 yes
   C6      ZR1     C5      C100    52.1(5)  1_555 1_555 1_555 1_555 yes
   C6      ZR1     C7      C8      -115.8(8) 1_555 1_555 1_555 1_555 yes
   C6      ZR1     C7      C101    -58.4(5) 1_555 1_555 1_555 1_555 yes
   C6      ZR1     C8      C7      36.7(5)  1_555 1_555 1_555 1_555 yes
   C6      ZR1     C8      C9      -76.6(5) 1_555 1_555 1_555 1_555 yes
   C6      ZR1     C8      C101    -20.8(4) 1_555 1_555 1_555 1_555 yes
   C6      ZR1     C9      C8      78.2(5)  1_555 1_555 1_555 1_555 yes
   C6      ZR1     C9      C10     -38.2(5) 1_555 1_555 1_555 1_555 yes
   C6      ZR1     C9      C101    20.8(4)  1_555 1_555 1_555 1_555 yes
   C6      ZR1     C10     C9      114.2(7) 1_555 1_555 1_555 1_555 yes
   C6      ZR1     C10     C101    57.5(5)  1_555 1_555 1_555 1_555 yes
   C6      ZR1     C11     C12     103.5(5) 1_555 1_555 1_555 1_555 yes
   C6      ZR1     C11     C19     -11(1)   1_555 1_555 1_555 1_555 yes
   C6      ZR1     C12     C11     -87.9(5) 1_555 1_555 1_555 1_555 yes
   C6      ZR1     C12     C13     131.5(4) 1_555 1_555 1_555 1_555 yes
   C6      ZR1     C13     C12     -67.4(6) 1_555 1_555 1_555 1_555 yes
   C6      ZR1     C13     C14     -178.8(5) 1_555 1_555 1_555 1_555 yes
   C6      ZR1     C101    C7      71.8(6)  1_555 1_555 1_555 1_555 yes
   C6      ZR1     C101    C8      143.4(6) 1_555 1_555 1_555 1_555 yes
   C6      ZR1     C101    C9      -143.5(6) 1_555 1_555 1_555 1_555 yes
   C6      ZR1     C101    C10     -72.9(6) 1_555 1_555 1_555 1_555 yes
   C6      C7      ZR1     C8      115.8(8) 1_555 1_555 1_555 1_555 yes
   C6      C7      ZR1     C9      78.0(6)  1_555 1_555 1_555 1_555 yes
   C6      C7      ZR1     C10     38.6(5)  1_555 1_555 1_555 1_555 yes
   C6      C7      ZR1     C11     46.2(7)  1_555 1_555 1_555 1_555 yes
   C6      C7      ZR1     C12     82.4(6)  1_555 1_555 1_555 1_555 yes
   C6      C7      ZR1     C13     122.7(6) 1_555 1_555 1_555 1_555 yes
   C6      C7      ZR1     C100    -118.0(5) 1_555 1_555 1_555 1_555 yes
   C6      C7      ZR1     C101    58.4(5)  1_555 1_555 1_555 1_555 yes
   C6      C7      C8      C9      3.2(9)   1_555 1_555 1_555 1_555 yes
   C6      C7      C8      C101    1.3(5)   1_555 1_555 1_555 1_555 yes
   C6      C7      C101    C8      -178.4(6) 1_555 1_555 1_555 1_555 yes
   C6      C7      C101    C9      177.9(8) 1_555 1_555 1_555 1_555 yes
   C6      C7      C101    C10     0.5(10)  1_555 1_555 1_555 1_555 yes
   C6      C10     ZR1     C7      -37.9(5) 1_555 1_555 1_555 1_555 yes
   C6      C10     ZR1     C8      -77.8(5) 1_555 1_555 1_555 1_555 yes
   C6      C10     ZR1     C9      -114.2(7) 1_555 1_555 1_555 1_555 yes
   C6      C10     ZR1     C11     147.7(6) 1_555 1_555 1_555 1_555 yes
   C6      C10     ZR1     C12     179.2(6) 1_555 1_555 1_555 1_555 yes
   C6      C10     ZR1     C13     -154.5(5) 1_555 1_555 1_555 1_555 yes
   C6      C10     ZR1     C100    2.6(7)   1_555 1_555 1_555 1_555 yes
   C6      C10     ZR1     C101    -57.5(5) 1_555 1_555 1_555 1_555 yes
   C6      C10     C9      C8      2.7(9)   1_555 1_555 1_555 1_555 yes
   C6      C10     C9      C101    1.0(5)   1_555 1_555 1_555 1_555 yes
   C6      C10     C101    C7      -0.5(10) 1_555 1_555 1_555 1_555 yes
   C6      C10     C101    C8      177.8(8) 1_555 1_555 1_555 1_555 yes
   C6      C10     C101    C9      -178.9(6) 1_555 1_555 1_555 1_555 yes
   C6      C101    ZR1     C7      -71.8(6) 1_555 1_555 1_555 1_555 yes
   C6      C101    ZR1     C8      -143.4(6) 1_555 1_555 1_555 1_555 yes
   C6      C101    ZR1     C9      143.5(6) 1_555 1_555 1_555 1_555 yes
   C6      C101    ZR1     C10     72.9(6)  1_555 1_555 1_555 1_555 yes
   C6      C101    ZR1     C11     98.8(5)  1_555 1_555 1_555 1_555 yes
   C6      C101    ZR1     C12     128.7(6) 1_555 1_555 1_555 1_555 yes
   C6      C101    ZR1     C13     162.8(6) 1_555 1_555 1_555 1_555 yes
   C6      C101    ZR1     C100    -67.6(5) 1_555 1_555 1_555 1_555 yes
   C6      C101    C7      C8      178.4(6) 1_555 1_555 1_555 1_555 yes
   C6      C101    C8      C7      -2.5(9)  1_555 1_555 1_555 1_555 yes
   C6      C101    C8      C9      179.8(8) 1_555 1_555 1_555 1_555 yes
   C6      C101    C9      C8      -179.8(8) 1_555 1_555 1_555 1_555 yes
   C6      C101    C9      C10     -1(1)    1_555 1_555 1_555 1_555 yes
   C6      C101    C10     C9      178.9(6) 1_555 1_555 1_555 1_555 yes
   C7      ZR1     N1      C11     88.7(5)  1_555 1_555 1_555 1_555 yes
   C7      ZR1     N1      C20     -71.6(9) 1_555 1_555 1_555 1_555 yes
   C7      ZR1     C1      C100    -2.9(6)  1_555 1_555 1_555 1_555 yes
   C7      ZR1     C2      C100    -79.5(4) 1_555 1_555 1_555 1_555 yes
   C7      ZR1     C3      C100    -145.4(5) 1_555 1_555 1_555 1_555 yes
   C7      ZR1     C4      C100    140.7(5) 1_555 1_555 1_555 1_555 yes
   C7      ZR1     C5      C100    75.2(4)  1_555 1_555 1_555 1_555 yes
   C7      ZR1     C6      C10     112.5(7) 1_555 1_555 1_555 1_555 yes
   C7      ZR1     C6      C101    56.3(5)  1_555 1_555 1_555 1_555 yes
   C7      ZR1     C8      C9      -113.3(7) 1_555 1_555 1_555 1_555 yes
   C7      ZR1     C8      C101    -57.4(5) 1_555 1_555 1_555 1_555 yes
   C7      ZR1     C9      C8      37.5(5)  1_555 1_555 1_555 1_555 yes
   C7      ZR1     C9      C10     -78.9(5) 1_555 1_555 1_555 1_555 yes
   C7      ZR1     C9      C101    -19.9(4) 1_555 1_555 1_555 1_555 yes
   C7      ZR1     C10     C9      76.2(5)  1_555 1_555 1_555 1_555 yes
   C7      ZR1     C10     C101    19.6(4)  1_555 1_555 1_555 1_555 yes
   C7      ZR1     C11     C12     80.0(5)  1_555 1_555 1_555 1_555 yes
   C7      ZR1     C11     C19     -34(1)   1_555 1_555 1_555 1_555 yes
   C7      ZR1     C12     C11     -122.2(5) 1_555 1_555 1_555 1_555 yes
   C7      ZR1     C12     C13     97.2(5)  1_555 1_555 1_555 1_555 yes
   C7      ZR1     C13     C12     -103.5(5) 1_555 1_555 1_555 1_555 yes
   C7      ZR1     C13     C14     145.1(5) 1_555 1_555 1_555 1_555 yes
   C7      ZR1     C101    C8      71.6(5)  1_555 1_555 1_555 1_555 yes
   C7      ZR1     C101    C9      144.6(6) 1_555 1_555 1_555 1_555 yes
   C7      ZR1     C101    C10     -144.8(7) 1_555 1_555 1_555 1_555 yes
   C7      C6      ZR1     C8      -36.0(5) 1_555 1_555 1_555 1_555 yes
   C7      C6      ZR1     C9      -76.2(5) 1_555 1_555 1_555 1_555 yes
   C7      C6      ZR1     C10     -112.5(7) 1_555 1_555 1_555 1_555 yes
   C7      C6      ZR1     C11     -146.0(5) 1_555 1_555 1_555 1_555 yes
   C7      C6      ZR1     C12     -113.3(5) 1_555 1_555 1_555 1_555 yes
   C7      C6      ZR1     C13     -78.6(7) 1_555 1_555 1_555 1_555 yes
   C7      C6      ZR1     C100    69.2(5)  1_555 1_555 1_555 1_555 yes
   C7      C6      ZR1     C101    -56.3(5) 1_555 1_555 1_555 1_555 yes
   C7      C6      C10     C9      -0.7(9)  1_555 1_555 1_555 1_555 yes
   C7      C6      C10     C101    0.2(5)   1_555 1_555 1_555 1_555 yes
   C7      C6      C101    C8      2.5(9)   1_555 1_555 1_555 1_555 yes
   C7      C6      C101    C9      -177.9(8) 1_555 1_555 1_555 1_555 yes
   C7      C6      C101    C10     -179.7(6) 1_555 1_555 1_555 1_555 yes
   C7      C8      ZR1     C9      113.3(7) 1_555 1_555 1_555 1_555 yes
   C7      C8      ZR1     C10     77.8(6)  1_555 1_555 1_555 1_555 yes
   C7      C8      ZR1     C11     129.4(5) 1_555 1_555 1_555 1_555 yes
   C7      C8      ZR1     C12     151.7(5) 1_555 1_555 1_555 1_555 yes
   C7      C8      ZR1     C13     -174.0(5) 1_555 1_555 1_555 1_555 yes
   C7      C8      ZR1     C100    -61.4(5) 1_555 1_555 1_555 1_555 yes
   C7      C8      ZR1     C101    57.4(5)  1_555 1_555 1_555 1_555 yes
   C7      C8      C9      C10     -3.7(9)  1_555 1_555 1_555 1_555 yes
   C7      C8      C9      C101    -1.9(5)  1_555 1_555 1_555 1_555 yes
   C7      C8      C101    C9      177.8(6) 1_555 1_555 1_555 1_555 yes
   C7      C8      C101    C10     -178.9(8) 1_555 1_555 1_555 1_555 yes
   C7      C101    ZR1     C8      -71.6(5) 1_555 1_555 1_555 1_555 yes
   C7      C101    ZR1     C9      -144.6(6) 1_555 1_555 1_555 1_555 yes
   C7      C101    ZR1     C10     144.8(7) 1_555 1_555 1_555 1_555 yes
   C7      C101    ZR1     C11     170.6(5) 1_555 1_555 1_555 1_555 yes
   C7      C101    ZR1     C12     -159.5(5) 1_555 1_555 1_555 1_555 yes
   C7      C101    ZR1     C13     -125.3(5) 1_555 1_555 1_555 1_555 yes
   C7      C101    ZR1     C100    4.3(5)   1_555 1_555 1_555 1_555 yes
   C7      C101    C6      C10     179.7(6) 1_555 1_555 1_555 1_555 yes
   C7      C101    C8      C9      -177.8(6) 1_555 1_555 1_555 1_555 yes
   C7      C101    C9      C8      3.7(9)   1_555 1_555 1_555 1_555 yes
   C7      C101    C9      C10     -178.4(8) 1_555 1_555 1_555 1_555 yes
   C7      C101    C10     C9      178.4(8) 1_555 1_555 1_555 1_555 yes
   C8      ZR1     N1      C11     34.7(6)  1_555 1_555 1_555 1_555 yes
   C8      ZR1     N1      C20     -125.6(8) 1_555 1_555 1_555 1_555 yes
   C8      ZR1     C1      C100    35.3(6)  1_555 1_555 1_555 1_555 yes
   C8      ZR1     C2      C100    -62.1(5) 1_555 1_555 1_555 1_555 yes
   C8      ZR1     C3      C100    -126.4(4) 1_555 1_555 1_555 1_555 yes
   C8      ZR1     C4      C100    170.2(5) 1_555 1_555 1_555 1_555 yes
   C8      ZR1     C5      C100    107.8(4) 1_555 1_555 1_555 1_555 yes
   C8      ZR1     C6      C10     76.4(5)  1_555 1_555 1_555 1_555 yes
   C8      ZR1     C6      C101    20.2(3)  1_555 1_555 1_555 1_555 yes
   C8      ZR1     C7      C101    57.4(5)  1_555 1_555 1_555 1_555 yes
   C8      ZR1     C9      C10     -116.4(7) 1_555 1_555 1_555 1_555 yes
   C8      ZR1     C9      C101    -57.4(5) 1_555 1_555 1_555 1_555 yes
   C8      ZR1     C10     C9      36.4(4)  1_555 1_555 1_555 1_555 yes
   C8      ZR1     C10     C101    -20.2(4) 1_555 1_555 1_555 1_555 yes
   C8      ZR1     C11     C12     47.1(5)  1_555 1_555 1_555 1_555 yes
   C8      ZR1     C11     C19     -67(1)   1_555 1_555 1_555 1_555 yes
   C8      ZR1     C12     C11     -138.8(5) 1_555 1_555 1_555 1_555 yes
   C8      ZR1     C12     C13     80.5(4)  1_555 1_555 1_555 1_555 yes
   C8      ZR1     C13     C12     -99.9(4) 1_555 1_555 1_555 1_555 yes
   C8      ZR1     C13     C14     148.7(6) 1_555 1_555 1_555 1_555 yes
   C8      ZR1     C101    C9      73.1(6)  1_555 1_555 1_555 1_555 yes
   C8      ZR1     C101    C10     143.7(6) 1_555 1_555 1_555 1_555 yes
   C8      C7      ZR1     C9      -37.8(5) 1_555 1_555 1_555 1_555 yes
   C8      C7      ZR1     C10     -77.2(5) 1_555 1_555 1_555 1_555 yes
   C8      C7      ZR1     C11     -69.6(6) 1_555 1_555 1_555 1_555 yes
   C8      C7      ZR1     C12     -33.4(6) 1_555 1_555 1_555 1_555 yes
   C8      C7      ZR1     C13     6.9(6)   1_555 1_555 1_555 1_555 yes
   C8      C7      ZR1     C100    126.2(5) 1_555 1_555 1_555 1_555 yes
   C8      C7      ZR1     C101    -57.4(5) 1_555 1_555 1_555 1_555 yes
   C8      C7      C6      C10     -1.6(9)  1_555 1_555 1_555 1_555 yes
   C8      C7      C6      C101    -1.3(5)  1_555 1_555 1_555 1_555 yes
   C8      C7      C101    C9      -3.7(9)  1_555 1_555 1_555 1_555 yes
   C8      C7      C101    C10     178.9(8) 1_555 1_555 1_555 1_555 yes
   C8      C9      ZR1     C10     116.4(7) 1_555 1_555 1_555 1_555 yes
   C8      C9      ZR1     C11     -165.5(5) 1_555 1_555 1_555 1_555 yes
   C8      C9      ZR1     C12     -138.5(6) 1_555 1_555 1_555 1_555 yes
   C8      C9      ZR1     C13     -103.7(6) 1_555 1_555 1_555 1_555 yes
   C8      C9      ZR1     C100    8.6(7)   1_555 1_555 1_555 1_555 yes
   C8      C9      ZR1     C101    57.4(5)  1_555 1_555 1_555 1_555 yes
   C8      C9      C10     C101    1.8(5)   1_555 1_555 1_555 1_555 yes
   C8      C9      C101    C10     -177.9(6) 1_555 1_555 1_555 1_555 yes
   C8      C101    ZR1     C9      -73.1(6) 1_555 1_555 1_555 1_555 yes
   C8      C101    ZR1     C10     -143.7(6) 1_555 1_555 1_555 1_555 yes
   C8      C101    ZR1     C11     -117.8(4) 1_555 1_555 1_555 1_555 yes
   C8      C101    ZR1     C12     -87.9(4) 1_555 1_555 1_555 1_555 yes
   C8      C101    ZR1     C13     -53.8(4) 1_555 1_555 1_555 1_555 yes
   C8      C101    ZR1     C100    75.8(4)  1_555 1_555 1_555 1_555 yes
   C8      C101    C6      C10     -177.8(8) 1_555 1_555 1_555 1_555 yes
   C8      C101    C9      C10     177.9(6) 1_555 1_555 1_555 1_555 yes
   C8      C101    C10     C9      -3.3(10) 1_555 1_555 1_555 1_555 yes
   C9      ZR1     N1      C11     32.9(5)  1_555 1_555 1_555 1_555 yes
   C9      ZR1     N1      C20     -127.4(7) 1_555 1_555 1_555 1_555 yes
   C9      ZR1     C1      C100    65(1)    1_555 1_555 1_555 1_555 yes
   C9      ZR1     C2      C100    -100.5(6) 1_555 1_555 1_555 1_555 yes
   C9      ZR1     C3      C100    -145.0(4) 1_555 1_555 1_555 1_555 yes
   C9      ZR1     C4      C100    170.0(4) 1_555 1_555 1_555 1_555 yes
   C9      ZR1     C5      C100    125.8(4) 1_555 1_555 1_555 1_555 yes
   C9      ZR1     C6      C10     36.2(4)  1_555 1_555 1_555 1_555 yes
   C9      ZR1     C6      C101    -19.9(4) 1_555 1_555 1_555 1_555 yes
   C9      ZR1     C7      C101    19.5(4)  1_555 1_555 1_555 1_555 yes
   C9      ZR1     C8      C101    55.9(5)  1_555 1_555 1_555 1_555 yes
   C9      ZR1     C10     C101    -56.6(5) 1_555 1_555 1_555 1_555 yes
   C9      ZR1     C11     C12     55.5(5)  1_555 1_555 1_555 1_555 yes
   C9      ZR1     C11     C19     -59(1)   1_555 1_555 1_555 1_555 yes
   C9      ZR1     C12     C11     -118.5(5) 1_555 1_555 1_555 1_555 yes
   C9      ZR1     C12     C13     100.9(5) 1_555 1_555 1_555 1_555 yes
   C9      ZR1     C13     C12     -69.3(4) 1_555 1_555 1_555 1_555 yes
   C9      ZR1     C13     C14     179.3(6) 1_555 1_555 1_555 1_555 yes
   C9      ZR1     C101    C10     70.6(6)  1_555 1_555 1_555 1_555 yes
   C9      C8      ZR1     C10     -35.5(5) 1_555 1_555 1_555 1_555 yes
   C9      C8      ZR1     C11     16.2(6)  1_555 1_555 1_555 1_555 yes
   C9      C8      ZR1     C12     38.4(5)  1_555 1_555 1_555 1_555 yes
   C9      C8      ZR1     C13     72.7(5)  1_555 1_555 1_555 1_555 yes
   C9      C8      ZR1     C100    -174.7(5) 1_555 1_555 1_555 1_555 yes
   C9      C8      ZR1     C101    -55.9(5) 1_555 1_555 1_555 1_555 yes
   C9      C8      C7      C101    1.9(5)   1_555 1_555 1_555 1_555 yes
   C9      C8      C101    C10     3.3(10)  1_555 1_555 1_555 1_555 yes
   C9      C10     ZR1     C11     -98.1(5) 1_555 1_555 1_555 1_555 yes
   C9      C10     ZR1     C12     -66.6(5) 1_555 1_555 1_555 1_555 yes
   C9      C10     ZR1     C13     -40.4(5) 1_555 1_555 1_555 1_555 yes
   C9      C10     ZR1     C100    116.8(6) 1_555 1_555 1_555 1_555 yes
   C9      C10     ZR1     C101    56.6(5)  1_555 1_555 1_555 1_555 yes
   C9      C10     C6      C101    -1.0(5)  1_555 1_555 1_555 1_555 yes
   C9      C101    ZR1     C10     -70.6(6) 1_555 1_555 1_555 1_555 yes
   C9      C101    ZR1     C11     -44.7(5) 1_555 1_555 1_555 1_555 yes
   C9      C101    ZR1     C12     -14.9(5) 1_555 1_555 1_555 1_555 yes
   C9      C101    ZR1     C13     19.3(5)  1_555 1_555 1_555 1_555 yes
   C9      C101    ZR1     C100    148.9(5) 1_555 1_555 1_555 1_555 yes
   C9      C101    C6      C10     1.8(10)  1_555 1_555 1_555 1_555 yes
   C10     ZR1     N1      C11     59.8(5)  1_555 1_555 1_555 1_555 yes
   C10     ZR1     N1      C20     -100.5(8) 1_555 1_555 1_555 1_555 yes
   C10     ZR1     C1      C100    -77.3(8) 1_555 1_555 1_555 1_555 yes
   C10     ZR1     C2      C100    -131.8(4) 1_555 1_555 1_555 1_555 yes
   C10     ZR1     C3      C100    -178.6(4) 1_555 1_555 1_555 1_555 yes
   C10     ZR1     C4      C100    134.9(4) 1_555 1_555 1_555 1_555 yes
   C10     ZR1     C5      C100    84.1(9)  1_555 1_555 1_555 1_555 yes
   C10     ZR1     C6      C101    -56.2(5) 1_555 1_555 1_555 1_555 yes
   C10     ZR1     C7      C101    -19.8(4) 1_555 1_555 1_555 1_555 yes
   C10     ZR1     C8      C101    20.4(4)  1_555 1_555 1_555 1_555 yes
   C10     ZR1     C9      C101    59.0(5)  1_555 1_555 1_555 1_555 yes
   C10     ZR1     C11     C12     86.0(5)  1_555 1_555 1_555 1_555 yes
   C10     ZR1     C11     C19     -28(1)   1_555 1_555 1_555 1_555 yes
   C10     ZR1     C12     C11     -88.4(5) 1_555 1_555 1_555 1_555 yes
   C10     ZR1     C12     C13     131.0(5) 1_555 1_555 1_555 1_555 yes
   C10     ZR1     C13     C12     -49.6(4) 1_555 1_555 1_555 1_555 yes
   C10     ZR1     C13     C14     -161.0(6) 1_555 1_555 1_555 1_555 yes
   C10     C6      ZR1     C11     -33.6(6) 1_555 1_555 1_555 1_555 yes
   C10     C6      ZR1     C12     -0.8(6)  1_555 1_555 1_555 1_555 yes
   C10     C6      ZR1     C13     33.8(7)  1_555 1_555 1_555 1_555 yes
   C10     C6      ZR1     C100    -178.3(5) 1_555 1_555 1_555 1_555 yes
   C10     C6      ZR1     C101    56.2(5)  1_555 1_555 1_555 1_555 yes
   C10     C6      C7      C101    -0.2(5)  1_555 1_555 1_555 1_555 yes
   C10     C9      ZR1     C11     78.1(5)  1_555 1_555 1_555 1_555 yes
   C10     C9      ZR1     C12     105.1(6) 1_555 1_555 1_555 1_555 yes
   C10     C9      ZR1     C13     140.0(6) 1_555 1_555 1_555 1_555 yes
   C10     C9      ZR1     C100    -107.8(6) 1_555 1_555 1_555 1_555 yes
   C10     C9      ZR1     C101    -59.0(5) 1_555 1_555 1_555 1_555 yes
   C10     C9      C8      C101    -1.8(5)  1_555 1_555 1_555 1_555 yes
   C10     C101    ZR1     C11     25.9(6)  1_555 1_555 1_555 1_555 yes
   C10     C101    ZR1     C12     55.8(6)  1_555 1_555 1_555 1_555 yes
   C10     C101    ZR1     C13     89.9(6)  1_555 1_555 1_555 1_555 yes
   C10     C101    ZR1     C100    -140.5(5) 1_555 1_555 1_555 1_555 yes
   C11     ZR1     N1      C20     -160.3(10) 1_555 1_555 1_555 1_555 yes
   C11     ZR1     C1      C100    -170.1(4) 1_555 1_555 1_555 1_555 yes
   C11     ZR1     C2      C100    133.7(3) 1_555 1_555 1_555 1_555 yes
   C11     ZR1     C3      C100    74.0(6)  1_555 1_555 1_555 1_555 yes
   C11     ZR1     C4      C100    -42.0(8) 1_555 1_555 1_555 1_555 yes
   C11     ZR1     C5      C100    -115.0(4) 1_555 1_555 1_555 1_555 yes
   C11     ZR1     C6      C101    -89.7(5) 1_555 1_555 1_555 1_555 yes
   C11     ZR1     C7      C101    -12.3(6) 1_555 1_555 1_555 1_555 yes
   C11     ZR1     C8      C101    72.0(4)  1_555 1_555 1_555 1_555 yes
   C11     ZR1     C9      C101    137.1(4) 1_555 1_555 1_555 1_555 yes
   C11     ZR1     C10     C101    -154.7(5) 1_555 1_555 1_555 1_555 yes
   C11     ZR1     C12     C13     -140.6(7) 1_555 1_555 1_555 1_555 yes
   C11     ZR1     C13     C12     21.8(4)  1_555 1_555 1_555 1_555 yes
   C11     ZR1     C13     C14     -89.6(6) 1_555 1_555 1_555 1_555 yes
   C11     N1      ZR1     C12     -14.7(4) 1_555 1_555 1_555 1_555 yes
   C11     N1      ZR1     C13     -42.4(4) 1_555 1_555 1_555 1_555 yes
   C11     N1      ZR1     C100    -153.2(4) 1_555 1_555 1_555 1_555 yes
   C11     N1      ZR1     C101    60.9(4)  1_555 1_555 1_555 1_555 yes
   C11     N1      C20     C21     -93.0(8) 1_555 1_555 1_555 1_555 yes
   C11     N1      C20     C25     93.7(9)  1_555 1_555 1_555 1_555 yes
   C11     C12     ZR1     C13     140.6(7) 1_555 1_555 1_555 1_555 yes
   C11     C12     ZR1     C100    88.6(5)  1_555 1_555 1_555 1_555 yes
   C11     C12     ZR1     C101    -111.4(4) 1_555 1_555 1_555 1_555 yes
   C11     C12     C13     C14     70.5(10) 1_555 1_555 1_555 1_555 yes
   C11     C19     C18     C17     -53.1(9) 1_555 1_555 1_555 1_555 yes
   C12     ZR1     N1      C20     -175.0(8) 1_555 1_555 1_555 1_555 yes
   C12     ZR1     C1      C100    159.4(4) 1_555 1_555 1_555 1_555 yes
   C12     ZR1     C2      C100    109.7(4) 1_555 1_555 1_555 1_555 yes
   C12     ZR1     C3      C100    18(1)    1_555 1_555 1_555 1_555 yes
   C12     ZR1     C4      C100    -98.3(5) 1_555 1_555 1_555 1_555 yes
   C12     ZR1     C5      C100    -149.4(3) 1_555 1_555 1_555 1_555 yes
   C12     ZR1     C6      C101    -57.0(5) 1_555 1_555 1_555 1_555 yes
   C12     ZR1     C7      C101    24.0(6)  1_555 1_555 1_555 1_555 yes
   C12     ZR1     C8      C101    94.3(4)  1_555 1_555 1_555 1_555 yes
   C12     ZR1     C9      C101    164.2(5) 1_555 1_555 1_555 1_555 yes
   C12     ZR1     C10     C101    -123.2(5) 1_555 1_555 1_555 1_555 yes
   C12     ZR1     C11     C19     -114(1)  1_555 1_555 1_555 1_555 yes
   C12     ZR1     C13     C14     -111.4(7) 1_555 1_555 1_555 1_555 yes
   C12     C11     ZR1     C13     -24.3(4) 1_555 1_555 1_555 1_555 yes
   C12     C11     ZR1     C100    -120.2(4) 1_555 1_555 1_555 1_555 yes
   C12     C11     ZR1     C101    74.2(4)  1_555 1_555 1_555 1_555 yes
   C12     C11     N1      C20     -168.4(6) 1_555 1_555 1_555 1_555 yes
   C12     C11     C19     C18     76.9(8)  1_555 1_555 1_555 1_555 yes
   C12     C13     ZR1     C100    145.1(4) 1_555 1_555 1_555 1_555 yes
   C12     C13     ZR1     C101    -78.1(4) 1_555 1_555 1_555 1_555 yes
   C12     C13     C14     C15     48.9(9)  1_555 1_555 1_555 1_555 yes
   C13     ZR1     N1      C20     157.3(7) 1_555 1_555 1_555 1_555 yes
   C13     ZR1     C1      C100    127.8(4) 1_555 1_555 1_555 1_555 yes
   C13     ZR1     C2      C100    64.0(5)  1_555 1_555 1_555 1_555 yes
   C13     ZR1     C3      C100    -30.5(6) 1_555 1_555 1_555 1_555 yes
   C13     ZR1     C4      C100    -103.3(4) 1_555 1_555 1_555 1_555 yes
   C13     ZR1     C5      C100    -166.6(4) 1_555 1_555 1_555 1_555 yes
   C13     ZR1     C6      C101    -22.3(7) 1_555 1_555 1_555 1_555 yes
   C13     ZR1     C7      C101    64.2(5)  1_555 1_555 1_555 1_555 yes
   C13     ZR1     C8      C101    128.6(4) 1_555 1_555 1_555 1_555 yes
   C13     ZR1     C9      C101    -161.0(5) 1_555 1_555 1_555 1_555 yes
   C13     ZR1     C10     C101    -97.0(5) 1_555 1_555 1_555 1_555 yes
   C13     ZR1     C11     C19     -139(1)  1_555 1_555 1_555 1_555 yes
   C13     C12     ZR1     C100    -52.0(5) 1_555 1_555 1_555 1_555 yes
   C13     C12     ZR1     C101    108.0(4) 1_555 1_555 1_555 1_555 yes
   C13     C12     C11     C19     -156.9(7) 1_555 1_555 1_555 1_555 yes
   C13     C14     C15     C16     -85.1(8) 1_555 1_555 1_555 1_555 yes
   C14     C13     ZR1     C100    33.7(6)  1_555 1_555 1_555 1_555 yes
   C14     C13     ZR1     C101    170.5(5) 1_555 1_555 1_555 1_555 yes
   C14     C15     C16     C17     91.0(9)  1_555 1_555 1_555 1_555 yes
   C15     C16     C17     C18     -118.9(8) 1_555 1_555 1_555 1_555 yes
   C16     C17     C18     C19     96.4(8)  1_555 1_555 1_555 1_555 yes
   C19     C11     ZR1     C100    125(1)   1_555 1_555 1_555 1_555 yes
   C19     C11     ZR1     C101    -40(1)   1_555 1_555 1_555 1_555 yes
   C19     C11     N1      C20     10(1)    1_555 1_555 1_555 1_555 yes
   C20     N1      ZR1     C100    46.5(7)  1_555 1_555 1_555 1_555 yes
   C20     N1      ZR1     C101    -99.4(7) 1_555 1_555 1_555 1_555 yes
   C20     C21     C22     C23     2(1)     1_555 1_555 1_555 1_555 yes
   C20     C25     C24     C23     0(1)     1_555 1_555 1_555 1_555 yes
   C21     C20     C25     C24     -1(1)    1_555 1_555 1_555 1_555 yes
   C21     C20     C25     C27     177.4(6) 1_555 1_555 1_555 1_555 yes
   C21     C22     C23     C24     -3(1)    1_555 1_555 1_555 1_555 yes
   C22     C21     C20     C25     0(1)     1_555 1_555 1_555 1_555 yes
   C22     C23     C24     C25     1(1)     1_555 1_555 1_555 1_555 yes
   C23     C22     C21     C26     -179.6(7) 1_555 1_555 1_555 1_555 yes
   C23     C24     C25     C27     -178.4(7) 1_555 1_555 1_555 1_555 yes
   C25     C20     C21     C26     -177.9(7) 1_555 1_555 1_555 1_555 yes
   C100    ZR1     C6      C101    125.5(4) 1_555 1_555 1_555 1_555 yes
   C100    ZR1     C7      C101    -176.5(4) 1_555 1_555 1_555 1_555 yes
   C100    ZR1     C8      C101    -118.8(3) 1_555 1_555 1_555 1_555 yes
   C100    ZR1     C9      C101    -48.7(7) 1_555 1_555 1_555 1_555 yes
   C100    ZR1     C10     C101    60.1(7)  1_555 1_555 1_555 1_555 yes
   C100    C1      ZR1     C101    -7.8(8)  1_555 1_555 1_555 1_555 yes
   C100    C2      ZR1     C101    -96.9(4) 1_555 1_555 1_555 1_555 yes
   C100    C3      ZR1     C101    -154.2(3) 1_555 1_555 1_555 1_555 yes
   C100    C4      ZR1     C101    147.2(4) 1_555 1_555 1_555 1_555 yes
   C100    C5      ZR1     C101    89.4(4)  1_555 1_555 1_555 1_555 yes

#------------------------------------------------------------------------------

loop_
_geom_contact_atom_site_label_1
_geom_contact_atom_site_label_2
_geom_contact_distance
_geom_contact_site_symmetry_1
_geom_contact_site_symmetry_2
_geom_contact_publ_flag
 ZR1       C1        2.535(8)   . . ?
 ZR1       C2        2.538(8)   . . ?
 ZR1       C3        2.528(9)   . . ?
 ZR1       C4        2.510(7)   . . ?
 ZR1       C5        2.546(8)   . . ?
 ZR1       C6        2.520(8)   . . ?
 ZR1       C7        2.560(7)   . . ?
 ZR1       C8        2.581(7)   . . ?
 ZR1       C9        2.610(8)   . . ?
 ZR1       C10       2.537(8)   . . ?
 ZR1       C11       2.652(7)   . . ?
 C3        C9        3.47(1)    . 1_565 ?

#------------------------------------------------------------------------------
